# Supplementary material
Source: Hindawi journal article supplement (doi:10.1155/2011/539762)
Supplement: f1 [file 539762.f1.pdf]

## Supporting Information

On the Involvement of Copper binding to the N-Terminus of the Amyloid Beta Peptide of Alzheimer's Disease: A Computational Study

by

Samira Azimi and Arvi Rauk

**Table S1. B3LYP/6-31+G(d) structures of all species discussed in the paper and displayed in Figures 1 – 3.**

**1** - D1 (Asp1)\_LB, 6-311+g(2df,2p), Energy(B3LYP/SB)= -531.752579

|     |           |           |           |
|-----|-----------|-----------|-----------|
| 0 1 |           |           |           |
| C   | 0.002155  | 0.327219  | -0.397226 |
| H   | 0.092284  | 0.069224  | -1.460742 |
| C   | 0.917003  | -0.579447 | 0.448645  |
| C   | -1.457006 | 0.262755  | 0.067889  |
| H   | 0.823059  | -0.300457 | 1.509286  |
| H   | 0.576633  | -1.614846 | 0.357236  |
| O   | -1.857596 | 1.022872  | 0.964407  |
| N   | -2.215653 | -0.670747 | -0.522314 |
| H   | -1.806688 | -1.243980 | -1.270151 |
| C   | -3.597603 | -0.922559 | -0.125860 |
| H   | -4.048015 | -1.594909 | -0.858381 |
| H   | -3.644198 | -1.386239 | 0.866293  |
| H   | -4.160315 | 0.015138  | -0.100524 |
| N   | 0.477478  | 1.741585  | -0.260193 |
| H   | 1.533737  | 1.672621  | -0.341738 |
| H   | 0.085182  | 2.362640  | -0.984861 |
| H   | 0.215807  | 2.126922  | 0.661464  |
| C   | 2.418130  | -0.501300 | 0.067896  |
| O   | 2.853692  | 0.624274  | -0.350873 |
| O   | 3.104362  | -1.537395 | 0.227916  |

**2a**(H<sub>2</sub>O)<sub>2</sub> - DCu(II)(H<sub>2</sub>O)<sub>2</sub><sup>+</sup>\_LB, 6-311+g(2df,2p), Energy(B3LYP/SB)= -2324.213653

|     |           |           |           |
|-----|-----------|-----------|-----------|
| 1 2 |           |           |           |
| C   | -1.195020 | 0.310615  | 1.302895  |
| H   | -1.939216 | 0.220490  | 2.105272  |
| C   | -1.114954 | 1.792316  | 0.881093  |
| C   | -1.598429 | -0.614213 | 0.135608  |
| H   | -2.101552 | 2.139461  | 0.561912  |
| H   | -0.860832 | 2.391526  | 1.767047  |
| O   | -0.723399 | -1.250911 | -0.487012 |
| N   | -2.893609 | -0.671557 | -0.179475 |
| H   | -3.558016 | -0.149864 | 0.379348  |
| C   | -3.401540 | -1.447996 | -1.316570 |
| H   | -4.452811 | -1.196603 | -1.460729 |

|    |           |           |           |
|----|-----------|-----------|-----------|
| H  | -2.839067 | -1.197322 | -2.218811 |
| H  | -3.307506 | -2.520340 | -1.121858 |
| N  | 0.131994  | -0.152879 | 1.791593  |
| H  | 0.510865  | 0.520191  | 2.459764  |
| H  | 0.058260  | -1.048673 | 2.277966  |
| C  | -0.117705 | 2.185846  | -0.227189 |
| O  | -0.328892 | 3.179734  | -0.891988 |
| O  | 0.980089  | 1.459787  | -0.372442 |
| Cu | 1.308101  | -0.320787 | 0.126234  |
| O  | 1.676230  | -2.328030 | 0.407742  |
| O  | 2.746548  | -0.130401 | -1.349397 |
| H  | 0.931773  | -2.753531 | -0.059902 |
| H  | 2.489675  | -2.764874 | 0.102009  |
| H  | 3.708013  | -0.144544 | -1.204234 |
| H  | 2.518080  | 0.777116  | -1.643628 |

---

**2b**(H<sub>2</sub>O)<sub>2</sub> - DCu(II)(H<sub>2</sub>O)<sub>2</sub><sup>+</sup>\_LB, 6-311+g(2df,2p), Energy(B3LYP/SB)= -2324.20127

1 2

|    |           |           |           |
|----|-----------|-----------|-----------|
| C  | 1.211618  | 0.174388  | -0.447138 |
| H  | 1.274805  | 0.599176  | -1.454280 |
| C  | 0.854184  | 1.276401  | 0.566214  |
| C  | 2.540785  | -0.516113 | -0.042774 |
| H  | 0.695913  | 0.821140  | 1.554072  |
| H  | 1.689879  | 1.973626  | 0.665769  |
| O  | 2.481407  | -1.589981 | 0.565836  |
| N  | 3.682351  | 0.112449  | -0.360111 |
| H  | 3.640805  | 0.994808  | -0.854633 |
| C  | 4.996398  | -0.402208 | 0.038524  |
| H  | 5.762709  | 0.144722  | -0.512542 |
| H  | 5.155400  | -0.271132 | 1.113373  |
| H  | 5.062892  | -1.465610 | -0.201185 |
| N  | 0.181225  | -0.915854 | -0.461978 |
| H  | 0.216609  | -1.382715 | -1.372625 |
| H  | 0.566054  | -1.613165 | 0.201908  |
| C  | -0.376577 | 2.099435  | 0.179978  |
| O  | -1.491852 | 1.416820  | -0.079779 |
| O  | -0.353440 | 3.310721  | 0.127652  |
| Cu | -1.710697 | -0.427727 | -0.084603 |
| O  | -3.711896 | 0.087998  | -0.005251 |
| H  | -3.641118 | 1.062506  | 0.069944  |
| H  | -4.326215 | -0.090272 | -0.738995 |
| O  | -2.397789 | -2.346589 | 0.241085  |
| H  | -3.230218 | -2.426045 | 0.740049  |
| H  | -1.872218 | -3.142302 | 0.432096  |

---

**2c**(H<sub>2</sub>O)<sub>2</sub> - DCu(II)(H<sub>2</sub>O)<sub>2</sub><sup>+</sup>\_LB, 6-311+g(2df,2p), Energy(B3LYP/SB)= -2324.180325

1 2

|    |           |           |           |
|----|-----------|-----------|-----------|
| C  | -1.956409 | 0.178379  | -0.642970 |
| H  | -1.427142 | 0.342970  | -1.582512 |
| C  | -1.913388 | 1.445915  | 0.221340  |
| C  | -1.456577 | -1.105008 | 0.091916  |
| H  | -2.555645 | 2.219802  | -0.220271 |
| H  | -2.295447 | 1.250824  | 1.230341  |
| O  | -2.355630 | -1.924835 | 0.404555  |
| N  | -0.167911 | -1.248697 | 0.366874  |
| C  | 0.163562  | -2.450778 | 1.158836  |
| H  | 1.216057  | -2.419719 | 1.450639  |
| H  | -0.445805 | -2.490858 | 2.066970  |
| H  | -0.031054 | -3.366648 | 0.587472  |
| N  | -3.398602 | -0.175798 | -0.966714 |
| H  | -3.556131 | -0.374766 | -1.958049 |
| H  | -3.512840 | -1.080004 | -0.395127 |
| C  | -0.524276 | 2.092875  | 0.345304  |
| O  | 0.434494  | 1.563058  | -0.400374 |
| O  | -0.375934 | 3.076434  | 1.041282  |
| H  | -4.070631 | 0.534904  | -0.666142 |
| Cu | 1.288294  | -0.097912 | -0.130668 |
| O  | 2.965704  | 1.122620  | -0.226308 |
| H  | 3.588266  | 1.201070  | 0.517699  |
| H  | 2.481417  | 1.974945  | -0.286477 |
| O  | 2.650945  | -1.601230 | -0.552817 |
| H  | 2.366341  | -2.488246 | -0.830994 |
| H  | 3.413584  | -1.350053 | -1.102577 |

---

**2a(Im)(H<sub>2</sub>O) - DCu(II) (Im) (H<sub>2</sub>O)<sup>+</sup>\_LB, 6-311+g(2df,2p), Energy(B3LYP/SB)= -2474.047467**

1 2

|   |             |             |             |
|---|-------------|-------------|-------------|
| C | 1.69473800  | 0.45973600  | 1.41959900  |
| H | 2.06623100  | 1.03390500  | 2.27954100  |
| C | 2.69635800  | -0.67329400 | 1.12448000  |
| C | 1.51854000  | 1.41588300  | 0.22185100  |
| H | 3.69056100  | -0.25337300 | 0.94755800  |
| H | 2.79431300  | -1.29639500 | 2.02481500  |
| O | 0.52167000  | 1.32406700  | -0.51701000 |
| N | 2.49074400  | 2.31344300  | 0.01791900  |
| H | 3.27014700  | 2.34903900  | 0.66292200  |
| C | 2.49625800  | 3.22465900  | -1.12982100 |
| H | 3.45087300  | 3.75201800  | -1.14525500 |
| H | 2.37731300  | 2.65977600  | -2.05773600 |
| H | 1.68229000  | 3.95115500  | -1.04816900 |
| N | 0.35847000  | -0.10940600 | 1.73336500  |
| H | 0.45569500  | -0.86877300 | 2.40868900  |
| H | -0.25197300 | 0.59304000  | 2.15296700  |
| C | 2.38615600  | -1.62098600 | -0.05318700 |
| O | 3.30229700  | -2.23270200 | -0.56979700 |

|    |             |             |             |
|----|-------------|-------------|-------------|
| O  | 1.12783900  | -1.76840600 | -0.41464800 |
| Cu | -0.43232700 | -0.75205800 | -0.07112200 |
| O  | -0.90225300 | -1.60819200 | -1.92795600 |
| H  | -1.65831900 | -2.19786400 | -2.08277000 |
| H  | -0.08315500 | -2.13726100 | -2.03326000 |
| C  | -3.38608000 | -0.57435200 | 0.75690500  |
| C  | -4.46253500 | 0.24676100  | 0.55602800  |
| C  | -2.67044900 | 1.11358300  | -0.42455800 |
| H  | -3.33852000 | -1.51112300 | 1.29280700  |
| H  | -5.49290300 | 0.17466400  | 0.86913300  |
| H  | -4.53280900 | 2.09335200  | -0.51906800 |
| H  | -2.04014400 | 1.78634700  | -0.98784600 |
| N  | -2.27423700 | -0.02211000 | 0.14092800  |
| N  | -3.98732600 | 1.30537500  | -0.19139200 |

---

**2b(Im)(H<sub>2</sub>O) - DCu(II) (Im) (H<sub>2</sub>O)<sup>+</sup>\_LB, 6-311+g(2df,2p), Energy(B3LYP/SB)= -2474.044391**

1 2

|    |           |           |           |
|----|-----------|-----------|-----------|
| C  | 2.193165  | -0.046924 | -1.257299 |
| H  | 2.997437  | -0.295401 | -1.964770 |
| C  | 1.999790  | 1.477370  | -1.254206 |
| C  | 2.585156  | -0.682590 | 0.094731  |
| H  | 2.959489  | 1.986611  | -1.129016 |
| H  | 1.634165  | 1.782513  | -2.244751 |
| O  | 2.085606  | -1.770586 | 0.440121  |
| N  | 3.512908  | -0.054039 | 0.822863  |
| H  | 3.824754  | 0.866323  | 0.540054  |
| C  | 4.004629  | -0.580915 | 2.099292  |
| H  | 4.924366  | -0.053982 | 2.356878  |
| H  | 3.265001  | -0.430231 | 2.892109  |
| H  | 4.208997  | -1.648493 | 1.999216  |
| N  | 0.936603  | -0.710900 | -1.708121 |
| H  | 0.708775  | -0.377498 | -2.647182 |
| H  | 1.091647  | -1.718687 | -1.784927 |
| C  | 1.030860  | 2.022755  | -0.192811 |
| O  | 1.330240  | 3.008504  | 0.458409  |
| O  | -0.126146 | 1.406233  | -0.049293 |
| Cu | -0.626139 | -0.371446 | -0.466394 |
| O  | -0.498287 | -2.380422 | 0.097862  |
| H  | 0.466172  | -2.410205 | 0.339217  |
| H  | -0.999264 | -2.682367 | 0.873458  |
| C  | -3.556671 | -0.871724 | -0.034528 |
| C  | -4.292354 | 0.981424  | 0.934615  |
| C  | -2.945803 | 1.086066  | 0.720707  |
| H  | -3.562129 | -1.853790 | -0.485352 |
| H  | -5.593576 | -0.646533 | 0.449226  |
| H  | -5.005225 | 1.660664  | 1.376331  |
| H  | -2.262282 | 1.891974  | 0.940842  |

|   |           |           |          |
|---|-----------|-----------|----------|
| N | -2.498375 | -0.078127 | 0.116923 |
| N | -4.657456 | -0.260013 | 0.450378 |

---

**2a(Im)<sub>2</sub>** - DCu(II) (Im)<sub>2</sub><sup>+</sup> \_LB, 6-311+g(2df,2p), Energy(B3LYP/SB)= -2623.873195

1 2

|    |           |           |           |
|----|-----------|-----------|-----------|
| C  | 2.330252  | -1.225570 | -0.779748 |
| H  | 2.944698  | -2.108122 | -1.006987 |
| C  | 3.047862  | 0.018647  | -1.335551 |
| C  | 2.115200  | -1.157178 | 0.745295  |
| H  | 4.036361  | 0.116705  | -0.877955 |
| H  | 3.232397  | -0.137555 | -2.408035 |
| O  | 0.993398  | -0.904001 | 1.215541  |
| N  | 3.191368  | -1.375374 | 1.515799  |
| H  | 4.081139  | -1.568493 | 1.073876  |
| C  | 3.149758  | -1.261503 | 2.975044  |
| H  | 4.130890  | -1.529949 | 3.369204  |
| H  | 2.904745  | -0.238071 | 3.274022  |
| H  | 2.396570  | -1.939242 | 3.385393  |
| N  | 0.991936  | -1.363523 | -1.406777 |
| H  | 1.070627  | -1.235265 | -2.416266 |
| H  | 0.609070  | -2.296194 | -1.249267 |
| C  | 2.333565  | 1.380315  | -1.196559 |
| O  | 3.013430  | 2.394774  | -1.248874 |
| O  | 1.029378  | 1.392915  | -1.093257 |
| Cu | -0.254565 | 0.073310  | -0.546543 |
| C  | -0.942244 | 2.857772  | 0.206379  |
| C  | -2.765672 | 2.821455  | 1.472518  |
| C  | -2.452704 | 1.549910  | 1.076596  |
| H  | -0.074917 | 3.210471  | -0.332280 |
| H  | -1.730486 | 4.636231  | 1.005091  |
| H  | -3.560982 | 3.211223  | 2.089195  |
| H  | -2.954537 | 0.624666  | 1.313763  |
| N  | -1.316166 | 1.584746  | 0.286912  |
| N  | -1.798267 | 3.630872  | 0.908969  |
| H  | -4.553609 | -2.621568 | -1.177573 |
| H  | -3.575872 | -3.703918 | 0.920291  |
| H  | -1.206734 | -2.311819 | 1.362765  |
| N  | -1.806523 | -1.245306 | -0.407054 |
| C  | -3.111138 | -2.894592 | 0.377987  |
| C  | -1.945447 | -2.204706 | 0.582194  |
| N  | -3.679324 | -2.340074 | -0.751074 |
| C  | -2.868732 | -1.351340 | -1.195372 |
| H  | -3.082006 | -0.743257 | -2.062881 |

---

**2b(Im)<sub>2</sub>** - DCu(II) (Im)<sub>2</sub><sup>+</sup> \_LB, 6-311+g(2df,2p), Energy(B3LYP/SB)= -2623.865365

1 2

|    |           |           |           |
|----|-----------|-----------|-----------|
| C  | -2.138526 | -1.677505 | -0.585608 |
| H  | -2.844629 | -2.285338 | -1.166972 |
| C  | -2.015403 | -2.280193 | 0.836727  |
| C  | -2.614097 | -0.219945 | -0.618525 |
| H  | -2.882496 | -1.984094 | 1.438686  |
| H  | -2.018002 | -3.372223 | 0.768191  |
| O  | -1.804592 | 0.700188  | -0.890405 |
| N  | -3.901416 | 0.029701  | -0.383000 |
| H  | -4.521909 | -0.750904 | -0.207301 |
| C  | -4.458733 | 1.385048  | -0.355267 |
| H  | -5.491986 | 1.324117  | -0.011408 |
| H  | -3.881400 | 2.010270  | 0.330001  |
| H  | -4.432578 | 1.831866  | -1.353335 |
| N  | -0.799928 | -1.668247 | -1.240246 |
| H  | -0.884026 | -1.630937 | -2.257049 |
| C  | -0.716099 | -1.810001 | 1.542405  |
| O  | 0.026484  | -2.668629 | 2.036194  |
| O  | -0.495484 | -0.543985 | 1.476807  |
| H  | -0.284526 | -2.519719 | -1.011729 |
| Cu | 0.116697  | 0.062193  | -0.503284 |
| C  | 1.310868  | 4.022823  | 0.255852  |
| C  | 0.684332  | 2.200025  | 1.358605  |
| H  | 1.627361  | 5.044743  | 0.114227  |
| H  | 1.153321  | 3.975597  | 2.388742  |
| H  | 0.416864  | 1.524241  | 2.159274  |
| N  | 0.675491  | 1.884053  | 0.069577  |
| N  | 1.066148  | 3.488354  | 1.505968  |
| C  | 1.062977  | 3.010476  | -0.631486 |
| H  | 1.127271  | 3.022368  | -1.709350 |
| C  | 2.445415  | -1.482802 | 0.427870  |
| C  | 4.122086  | -1.180360 | -1.001207 |
| C  | 3.017944  | -0.501832 | -1.440105 |
| H  | 1.873648  | -1.842896 | 1.279531  |
| H  | 4.316988  | -2.378773 | 0.761460  |
| H  | 5.116552  | -1.279581 | -1.408507 |
| H  | 2.905633  | 0.108364  | -2.324102 |
| N  | 1.980489  | -0.699736 | -0.544286 |
| N  | 3.736909  | -1.790653 | 0.176063  |

---

**3 - Asp1Ala2:** b3lyp/6-31+g(d) scrf-iefpcm: OPT: -779.167087628

0 1

|   |           |           |           |
|---|-----------|-----------|-----------|
| C | -1.794005 | -0.570140 | -0.261491 |
| H | -1.767289 | -0.494714 | -1.356330 |
| C | -2.251486 | 0.765059  | 0.356387  |
| C | -0.435282 | -1.009931 | 0.297367  |
| H | -2.231219 | 0.686054  | 1.453803  |
| H | -1.536765 | 1.545208  | 0.078245  |

|   |           |           |           |
|---|-----------|-----------|-----------|
| O | -0.386296 | -1.656986 | 1.354577  |
| N | 0.634145  | -0.604949 | -0.406792 |
| C | 2.013252  | -0.862752 | 0.003311  |
| C | -3.675192 | 1.220613  | -0.055234 |
| O | -3.904479 | 2.451504  | -0.039916 |
| O | -4.523326 | 0.307989  | -0.342285 |
| O | 2.722814  | 1.037598  | -1.317209 |
| C | 2.840888  | 0.405208  | -0.254682 |
| N | 3.710635  | 0.746281  | 0.711279  |
| H | 3.726027  | 0.205748  | 1.582345  |
| C | 4.618901  | 1.880168  | 0.577362  |
| H | 5.247433  | 1.767469  | -0.312234 |
| H | 4.061474  | 2.819529  | 0.491995  |
| H | 5.254045  | 1.918546  | 1.464441  |
| H | 1.993292  | -1.089144 | 1.074694  |
| C | 2.612884  | -2.054847 | -0.764965 |
| H | 2.617216  | -1.856839 | -1.842333 |
| H | 3.642426  | -2.242279 | -0.439405 |
| H | 2.018962  | -2.954611 | -0.574184 |
| H | 0.489618  | -0.136867 | -1.310561 |
| N | -2.802621 | -1.625950 | 0.069737  |
| H | -2.716923 | -1.918499 | 1.056659  |
| H | -3.739526 | -1.152705 | -0.094862 |
| H | -2.703347 | -2.465679 | -0.521509 |

4(H2O) - D1A2\_Cu2\_W: b3lyp/6-31+g(d) : OPT: -2495.12810223

1 2

|    |           |           |           |
|----|-----------|-----------|-----------|
| C  | -2.070062 | 0.617642  | -1.261378 |
| H  | -2.566655 | 1.065808  | -2.127542 |
| C  | -3.108336 | 0.575985  | -0.126181 |
| C  | -0.880404 | 1.546783  | -0.896402 |
| H  | -3.381807 | 1.604002  | 0.130274  |
| H  | -4.035135 | 0.097862  | -0.477539 |
| O  | -1.031687 | 2.768042  | -0.902120 |
| N  | 0.226338  | 0.858326  | -0.563192 |
| C  | 1.459537  | 1.484507  | -0.113634 |
| N  | -1.566569 | -0.751099 | -1.610958 |
| H  | -2.285014 | -1.464846 | -1.482333 |
| H  | -1.304356 | -0.777005 | -2.597665 |
| C  | -2.703862 | -0.159489 | 1.137749  |
| O  | -3.422341 | 0.241252  | 2.187748  |
| O  | -1.864601 | -1.050895 | 1.217135  |
| Cu | 0.116954  | -1.020497 | -0.470348 |
| O  | 2.017915  | -0.877649 | 0.100609  |
| O  | -0.075919 | -2.996804 | -0.027550 |
| H  | 0.738962  | -3.465671 | 0.223983  |
| H  | -0.689268 | -3.063829 | 0.727651  |

|   |           |           |           |
|---|-----------|-----------|-----------|
| H | -3.173984 | -0.289573 | 2.970626  |
| C | 2.436488  | 0.321798  | 0.087670  |
| N | 3.724781  | 0.580807  | 0.278519  |
| H | 4.022562  | 1.548551  | 0.258161  |
| C | 4.734345  | -0.453917 | 0.522780  |
| H | 4.511556  | -0.993202 | 1.447575  |
| H | 4.757745  | -1.163087 | -0.308734 |
| H | 5.706687  | 0.031542  | 0.612074  |
| H | 1.852775  | 2.154703  | -0.892727 |
| C | 1.299992  | 2.290299  | 1.195771  |
| H | 0.955895  | 1.643073  | 2.009904  |
| H | 2.246662  | 2.753380  | 1.496047  |
| H | 0.566756  | 3.083260  | 1.034925  |

4(H<sub>2</sub>O)(CO<sub>2</sub><sup>-</sup>) - D1A2\_Cu2\_W\_Om: b3lyp/6-31+g(d) : almost OPT(10<sup>-6</sup>): -2494.72328015

0 2

|    |           |           |           |
|----|-----------|-----------|-----------|
| C  | -1.950883 | 1.238031  | -1.062767 |
| H  | -2.389786 | 2.026577  | -1.687511 |
| C  | -2.994767 | 0.893161  | 0.021105  |
| C  | -0.657658 | 1.862654  | -0.490947 |
| H  | -3.045388 | 1.727157  | 0.731950  |
| H  | -3.987908 | 0.848547  | -0.442853 |
| O  | -0.538980 | 3.094761  | -0.396013 |
| N  | 0.267039  | 0.952428  | -0.155975 |
| C  | 1.577170  | 1.333177  | 0.312226  |
| N  | -1.616255 | 0.028132  | -1.863138 |
| H  | -2.466795 | -0.473226 | -2.121176 |
| H  | -1.158425 | 0.299578  | -2.732716 |
| C  | -2.876945 | -0.406569 | 0.853076  |
| O  | -3.863905 | -0.757687 | 1.492782  |
| O  | -1.754942 | -1.080673 | 0.852596  |
| Cu | -0.121617 | -0.906013 | -0.218177 |
| O  | 1.965015  | -1.012601 | -0.199113 |
| O  | -0.419849 | -2.946435 | -0.261096 |
| H  | 0.253746  | -3.479105 | 0.192003  |
| H  | -1.196589 | -2.871616 | 0.342388  |
| C  | 2.466260  | 0.117699  | 0.031349  |
| N  | 3.796365  | 0.277177  | 0.055481  |
| H  | 4.159652  | 1.202153  | 0.243132  |
| C  | 4.736617  | -0.821414 | -0.150171 |
| H  | 4.668318  | -1.550404 | 0.663906  |
| H  | 4.522366  | -1.330803 | -1.093783 |
| H  | 5.747460  | -0.410642 | -0.182401 |
| H  | 1.945643  | 2.197762  | -0.261542 |
| C  | 1.606896  | 1.701174  | 1.813806  |
| H  | 1.252426  | 0.862870  | 2.423474  |
| H  | 2.613442  | 1.981830  | 2.149476  |



H            0.939850      2.553147      1.968910

**4(Im) - D1A2\_Cu2\_Im: b3lyp/6-31+g(d) : OPT(10<sup>-7</sup>): -2644.96232341**

1 2

|    |           |           |           |
|----|-----------|-----------|-----------|
| C  | -2.172384 | -0.411850 | -1.190791 |
| H  | -2.048256 | -0.450844 | -2.279170 |
| C  | -3.640895 | -0.737408 | -0.878242 |
| C  | -1.806238 | 1.034659  | -0.779676 |
| H  | -4.265888 | 0.061723  | -1.286623 |
| H  | -3.948141 | -1.669642 | -1.372016 |
| O  | -2.622362 | 1.948811  | -0.913205 |
| N  | -0.535904 | 1.148005  | -0.351599 |
| C  | 0.020452  | 2.450094  | -0.025883 |
| N  | -1.187508 | -1.372077 | -0.601364 |
| H  | -1.550516 | -1.647506 | 0.320778  |
| H  | -1.109855 | -2.210521 | -1.177159 |
| C  | -3.932172 | -0.891899 | 0.599982  |
| O  | -5.221590 | -0.687896 | 0.889926  |
| O  | -3.103792 | -1.205778 | 1.443377  |
| Cu | 0.581198  | -0.365662 | -0.226832 |
| O  | 2.017351  | 1.068686  | 0.021148  |
| H  | -5.353443 | -0.838162 | 1.847016  |
| C  | 1.532275  | 2.239000  | 0.016818  |
| N  | 2.332183  | 3.301188  | 0.073856  |
| H  | 1.902838  | 4.218021  | 0.060488  |
| C  | 3.790757  | 3.217145  | 0.163465  |
| H  | 4.088412  | 2.699763  | 1.080102  |
| H  | 4.194507  | 2.680808  | -0.699838 |
| H  | 4.193006  | 4.230839  | 0.176089  |
| H  | -0.223281 | 3.171119  | -0.820428 |
| C  | -0.499579 | 3.008673  | 1.317742  |
| H  | -0.250957 | 2.331324  | 2.141841  |
| H  | -0.078031 | 3.996631  | 1.535868  |
| H  | -1.585580 | 3.107882  | 1.255302  |
| N  | 1.846908  | -1.873239 | -0.006200 |
| N  | 3.762487  | -2.923787 | 0.200176  |
| C  | 1.596109  | -3.225042 | 0.165172  |
| C  | 3.168245  | -1.724999 | 0.022143  |
| C  | 2.782928  | -3.891669 | 0.295229  |
| H  | 0.593942  | -3.624753 | 0.198256  |
| H  | 3.011763  | -4.935390 | 0.446611  |
| H  | 4.761140  | -3.081989 | 0.255885  |
| H  | 3.692596  | -0.786549 | -0.074676 |

**4(Im)(CO<sub>2</sub>) - D1A2\_Cu2\_Im\_Om: b3lyp/6-31+g(d) : OPT (10<sup>-7</sup>): -2644.53790573**

0 2

|    |           |           |           |
|----|-----------|-----------|-----------|
| C  | 0.237204  | -2.601666 | -1.224496 |
| H  | 0.050101  | -3.421727 | -1.930318 |
| C  | 1.182038  | -3.152376 | -0.138146 |
| C  | -1.156792 | -2.232168 | -0.674446 |
| H  | 0.631269  | -3.891233 | 0.457026  |
| H  | 1.990375  | -3.716134 | -0.621653 |
| O  | -2.089086 | -3.053612 | -0.734588 |
| N  | -1.230098 | -0.992232 | -0.171741 |
| C  | -2.493943 | -0.479751 | 0.296688  |
| N  | 0.853179  | -1.428026 | -1.896528 |
| H  | 1.831198  | -1.620703 | -2.114270 |
| H  | 0.383304  | -1.246830 | -2.782978 |
| C  | 1.883716  | -2.203812 | 0.862453  |
| O  | 2.802828  | -2.685720 | 1.528114  |
| O  | 1.511733  | -0.962754 | 0.979926  |
| Cu | 0.297328  | 0.151022  | -0.060699 |
| O  | -1.338645 | 1.616708  | -0.110713 |
| C  | -2.430441 | 1.033997  | 0.082362  |
| N  | -3.581278 | 1.727581  | 0.131149  |
| H  | -4.439947 | 1.211154  | 0.266359  |
| C  | -3.646572 | 3.177664  | -0.008776 |
| H  | -3.007872 | 3.662802  | 0.735578  |
| H  | -3.318775 | 3.488512  | -1.006523 |
| H  | -4.680185 | 3.495363  | 0.142988  |
| H  | -3.312565 | -0.902578 | -0.305971 |
| C  | -2.769165 | -0.814280 | 1.781530  |
| H  | -1.974359 | -0.415191 | 2.421113  |
| H  | -3.732766 | -0.415011 | 2.124071  |
| H  | -2.788425 | -1.902254 | 1.888429  |
| N  | 1.651740  | 1.628734  | -0.081257 |
| N  | 2.648350  | 3.561738  | -0.375884 |
| C  | 2.948055  | 1.524683  | 0.387023  |
| C  | 1.496568  | 2.863672  | -0.530744 |
| C  | 3.583309  | 2.724090  | 0.208902  |
| H  | 3.292003  | 0.600430  | 0.828157  |
| H  | 4.583966  | 3.053332  | 0.442880  |
| H  | 2.791882  | 4.528013  | -0.635182 |
| H  | 0.586520  | 3.270577  | -0.945628 |

**4(Im)<sub>2</sub>** - D1A2\_Cu2\_Im2: b3lyp/6-31+g(d) : almost OPT(10<sup>-6</sup>): -2871.21012354

1 2

|   |          |           |          |
|---|----------|-----------|----------|
| C | 2.225471 | -0.533063 | 1.074923 |
| H | 1.903573 | -0.602826 | 2.120541 |
| C | 3.703714 | -0.946113 | 1.016684 |
| C | 2.034369 | 0.947597  | 0.661484 |
| H | 4.291372 | -0.223528 | 1.589297 |
| H | 3.852833 | -1.928479 | 1.486492 |

|    |           |           |           |
|----|-----------|-----------|-----------|
| O  | 2.903758  | 1.786589  | 0.929244  |
| N  | 0.853779  | 1.169798  | 0.067535  |
| C  | 0.496232  | 2.502020  | -0.384242 |
| N  | 1.306051  | -1.401466 | 0.280659  |
| H  | 1.785264  | -1.634571 | -0.596176 |
| H  | 1.115671  | -2.269213 | 0.781282  |
| C  | 4.258950  | -1.028812 | -0.389383 |
| O  | 5.593862  | -0.911512 | -0.417759 |
| O  | 3.591502  | -1.220013 | -1.394842 |
| Cu | -0.378177 | -0.270889 | -0.208557 |
| O  | -1.556589 | 1.312799  | -0.902518 |
| H  | 5.890244  | -1.005090 | -1.344440 |
| C  | -0.983447 | 2.425502  | -0.756871 |
| N  | -1.650837 | 3.567287  | -0.948655 |
| H  | -1.146416 | 4.436739  | -0.831198 |
| C  | -3.052920 | 3.625839  | -1.357613 |
| H  | -3.177375 | 3.251116  | -2.378848 |
| H  | -3.667392 | 3.026372  | -0.680742 |
| H  | -3.381506 | 4.665409  | -1.316061 |
| H  | 0.629308  | 3.232519  | 0.428932  |
| C  | 1.334297  | 2.970836  | -1.596672 |
| H  | 1.207541  | 2.284091  | -2.440569 |
| H  | 1.051238  | 3.979894  | -1.918649 |
| H  | 2.387275  | 2.986775  | -1.307262 |
| N  | -1.507582 | -1.660883 | -1.163683 |
| N  | -3.068595 | -2.454402 | -2.491545 |
| C  | -1.345337 | -3.030549 | -1.273952 |
| C  | -2.556659 | -1.343693 | -1.912272 |
| C  | -2.311345 | -3.539776 | -2.099590 |
| H  | -0.550632 | -3.556546 | -0.766625 |
| H  | -2.518799 | -4.543650 | -2.437190 |
| H  | -3.863719 | -2.479108 | -3.117432 |
| H  | -2.945059 | -0.345403 | -2.046974 |
| C  | -1.131985 | 0.396406  | 2.929252  |
| C  | -1.932654 | 0.089331  | 3.999227  |
| C  | -2.391548 | -1.235924 | 2.285212  |
| N  | -1.425365 | -0.436282 | 1.865024  |
| N  | -2.729298 | -0.953320 | 3.571191  |
| H  | -0.370093 | 1.159069  | 2.853596  |
| H  | -2.007630 | 0.502610  | 4.993668  |
| H  | -3.439829 | -1.422868 | 4.117625  |
| H  | -2.868891 | -2.013163 | 1.705086  |

**4(Im)<sub>2</sub>(CO<sub>2</sub><sup>-</sup>) - D1A2\_Cu2\_Im2\_Om: b3lyp/6-31+g(d) : almost OPT (10<sup>-7</sup>): -2870.76148468**

|   |          |           |           |
|---|----------|-----------|-----------|
| O | 2        |           |           |
| C | 1.994430 | -0.240295 | -1.971340 |
| H | 1.948459 | -0.399854 | -3.054643 |

|    |           |           |           |
|----|-----------|-----------|-----------|
| C  | 3.442540  | 0.190187  | -1.590203 |
| C  | 1.625723  | -1.584976 | -1.315719 |
| H  | 4.059655  | -0.706667 | -1.503759 |
| H  | 3.840057  | 0.807261  | -2.405505 |
| O  | 2.147943  | -2.643042 | -1.695154 |
| N  | 0.729963  | -1.464035 | -0.315738 |
| C  | 0.421514  | -2.596546 | 0.529658  |
| N  | 1.018083  | 0.823032  | -1.581836 |
| H  | 1.575772  | 1.666858  | -1.308489 |
| H  | 0.364493  | 1.032097  | -2.333229 |
| C  | 3.520369  | 1.038746  | -0.284410 |
| O  | 4.114668  | 0.575783  | 0.700808  |
| O  | 2.923152  | 2.178677  | -0.372784 |
| Cu | -0.049286 | 0.231023  | 0.053003  |
| O  | -1.087503 | -0.944764 | 1.481783  |
| C  | -0.732824 | -2.145783 | 1.423207  |
| N  | -1.354837 | -3.075129 | 2.169727  |
| H  | -1.014163 | -4.025831 | 2.122223  |
| C  | -2.411626 | -2.752881 | 3.121462  |
| H  | -2.036949 | -2.097505 | 3.914971  |
| H  | -3.239601 | -2.248200 | 2.614723  |
| H  | -2.775158 | -3.682666 | 3.563858  |
| H  | 0.092151  | -3.461521 | -0.070456 |
| C  | 1.628152  | -3.039167 | 1.393134  |
| H  | 1.972808  | -2.211309 | 2.021290  |
| H  | 1.379768  | -3.897181 | 2.031591  |
| H  | 2.441659  | -3.328108 | 0.724613  |
| N  | -0.410139 | 1.963204  | 1.005707  |
| N  | -1.333721 | 3.429980  | 2.352854  |
| C  | 0.524957  | 2.954199  | 1.272136  |
| C  | -1.512264 | 2.271566  | 1.673052  |
| C  | -0.043885 | 3.874814  | 2.111018  |
| H  | 1.530713  | 2.893171  | 0.852222  |
| H  | 0.344710  | 4.778415  | 2.554933  |
| H  | -2.016846 | 3.874898  | 2.950109  |
| H  | -2.417464 | 1.683071  | 1.701357  |
| C  | -2.568889 | -0.786885 | -2.119180 |
| C  | -3.621442 | -0.467917 | -2.940355 |
| C  | -2.950630 | 1.309026  | -1.801510 |
| N  | -2.159916 | 0.326589  | -1.413366 |
| N  | -3.855842 | 0.876429  | -2.725476 |
| H  | -2.070801 | -1.738731 | -1.999706 |
| H  | -4.203787 | -1.049670 | -3.639020 |
| H  | -4.559327 | 1.440268  | -3.183054 |
| H  | -2.904819 | 2.333276  | -1.457122 |

5 - L\_LB: B3LYP/6-311+g(2df,2p), Energy(B3LYP/SB)= -777.24067

0 1

|   |           |           |           |
|---|-----------|-----------|-----------|
| C | 3.725769  | -0.553863 | 0.307272  |
| N | 3.834962  | 0.693727  | -0.271776 |
| C | 5.056842  | 0.762682  | -0.873443 |
| N | 5.746519  | -0.351651 | -0.714739 |
| C | 4.922622  | -1.177697 | 0.019614  |
| O | 1.160448  | 1.438325  | 0.136992  |
| C | 0.515349  | 0.380480  | 0.198331  |
| N | -0.837771 | 0.360036  | 0.164394  |
| C | -1.649335 | 1.557902  | -0.022032 |
| C | -3.004894 | 1.429663  | 0.694022  |
| C | -3.879624 | 0.330320  | 0.160656  |
| C | -5.167599 | 0.402920  | -0.317149 |
| N | -5.508224 | -0.888887 | -0.673168 |
| C | -4.432186 | -1.681944 | -0.407837 |
| N | -3.435980 | -0.982431 | 0.096079  |
| C | 2.521148  | -1.000095 | 1.079497  |
| C | 1.181520  | -0.992041 | 0.304839  |
| H | 0.482874  | -1.690904 | 0.781500  |
| H | 2.404750  | -0.399000 | 1.992370  |
| H | 2.712400  | -2.027491 | 1.409603  |
| H | 5.392049  | 1.640026  | -1.410867 |
| H | -1.340227 | -0.524702 | 0.172257  |
| H | -1.808047 | 1.746184  | -1.094013 |
| H | -2.820329 | 1.270009  | 1.765330  |
| H | -3.534847 | 2.385096  | 0.600700  |
| H | -4.428160 | -2.746808 | -0.597592 |
| H | -6.392222 | -1.189240 | -1.060138 |
| H | -5.853245 | 1.229729  | -0.430806 |
| H | 5.236779  | -2.173624 | 0.306128  |
| H | 1.347158  | -1.362603 | -0.716354 |
| H | -1.085984 | 2.404200  | 0.379023  |
| H | 3.069237  | 1.367002  | -0.261213 |

---

**6(H<sub>2</sub>O)<sub>2</sub> - L Cu(II) (H<sub>2</sub>O)<sub>2</sub><sup>2+</sup>\_LB: B3LYP/6-311+g(2df,2p), Energy(B3LYP/SB)= -2569.99388**

22

|    |           |           |           |
|----|-----------|-----------|-----------|
| C  | -3.882486 | -0.480816 | -0.618174 |
| C  | -2.789854 | -0.148316 | 0.142746  |
| N  | -1.694546 | -0.874696 | -0.340549 |
| C  | -2.135845 | -1.608403 | -1.365251 |
| N  | -3.448231 | -1.389866 | -1.557297 |
| C  | -2.744906 | 0.782756  | 1.322134  |
| C  | -2.538593 | 2.283332  | 1.014795  |
| Cu | 0.241934  | -0.789396 | 0.167764  |
| N  | 2.170877  | -0.410184 | -0.056604 |
| C  | 3.234685  | -0.954193 | 0.530307  |
| N  | 4.337879  | -0.254190 | 0.203553  |
| C  | 3.970657  | 0.788070  | -0.621572 |
| C  | 2.610635  | 0.698103  | -0.777966 |
| C  | 1.690217  | 1.576583  | -1.577991 |
| C  | 0.872544  | 2.628778  | -0.781419 |
| O  | 0.022076  | 1.044967  | 0.852063  |
| C  | -0.206703 | 2.051938  | 0.112473  |
| N  | -1.397560 | 2.639243  | 0.143770  |
| H  | 0.439527  | 3.343457  | -1.489129 |

|   |           |           |           |
|---|-----------|-----------|-----------|
| H | 1.008560  | 0.956110  | -2.175377 |
| H | 2.296366  | 2.129759  | -2.302202 |
| H | 3.230821  | -1.810527 | 1.189377  |
| H | 5.281657  | -0.463677 | 0.511188  |
| H | -1.513957 | 3.483321  | -0.408362 |
| H | -3.422473 | 2.681737  | 0.509707  |
| H | -1.995757 | 0.439066  | 2.035196  |
| H | -3.711996 | 0.728785  | 1.835755  |
| H | -1.542556 | -2.284713 | -1.961808 |
| H | -4.021963 | -1.834224 | -2.266098 |
| H | -4.914407 | -0.167005 | -0.557894 |
| H | 4.693437  | 1.481662  | -1.025794 |
| H | 1.549975  | 3.196592  | -0.129289 |
| H | -2.431348 | 2.821808  | 1.963716  |
| O | 0.506079  | -2.756191 | -0.556206 |
| H | 1.389874  | -2.987598 | -0.892422 |
| H | 0.198036  | -3.518828 | -0.035190 |
| O | 0.424608  | -1.536080 | 2.379308  |
| H | -0.079415 | -2.183235 | 2.901571  |
| H | 0.646394  | -0.820714 | 2.999990  |

---

**6(Im)(H<sub>2</sub>O) - LCu(II)(Im)(H<sub>2</sub>O)<sup>+</sup>\_LB: B3LYP/6-311+g(2df,2p), Energy(B3LYP/SB)= -2719.83236**

2 2

|    |           |           |           |
|----|-----------|-----------|-----------|
| C  | 3.407421  | 1.986458  | -0.733519 |
| C  | 2.667319  | 1.156555  | 0.071641  |
| N  | 1.338394  | 1.206775  | -0.360365 |
| C  | 1.301401  | 2.043779  | -1.395863 |
| N  | 2.532145  | 2.526861  | -1.650086 |
| C  | 3.138697  | 0.354064  | 1.251057  |
| C  | 3.739677  | -1.036002 | 0.940472  |
| Cu | -0.305676 | 0.149083  | 0.244491  |
| N  | -1.541238 | 1.711856  | -0.004269 |
| N  | -1.709554 | -1.266609 | -0.034571 |
| C  | -2.859988 | -1.444601 | 0.604623  |
| N  | -3.385576 | -2.642681 | 0.276340  |
| C  | -2.531709 | -3.266245 | -0.609659 |
| C  | -1.476638 | -2.408656 | -0.796345 |
| C  | -0.257131 | -2.589100 | -1.655314 |
| C  | 1.028445  | -3.060360 | -0.926523 |
| O  | 0.915672  | -1.337562 | 0.779813  |
| C  | 1.636969  | -2.035493 | 0.010303  |
| N  | 2.961507  | -1.905879 | 0.035626  |
| H  | 1.762429  | -3.375103 | -1.676050 |
| H  | -0.048932 | -1.661793 | -2.205304 |
| H  | -0.484545 | -3.342563 | -2.416095 |
| H  | -3.315320 | -0.753353 | 1.298472  |
| H  | -4.260797 | -3.019386 | 0.622683  |
| H  | 3.503088  | -2.533772 | -0.549040 |
| H  | 4.714626  | -0.917865 | 0.460448  |
| H  | 2.326217  | 0.262480  | 1.971636  |
| H  | 3.939835  | 0.910633  | 1.751634  |
| H  | 0.422455  | 2.318301  | -1.959337 |
| H  | 2.768600  | 3.188523  | -2.380915 |

|   |           |           |           |
|---|-----------|-----------|-----------|
| H | 4.455578  | 2.247230  | -0.718661 |
| H | -2.748131 | -4.238512 | -1.027472 |
| H | 0.795992  | -3.945174 | -0.318477 |
| H | 3.901401  | -1.566642 | 1.886239  |
| C | -1.401360 | 2.930585  | 0.642672  |
| C | -2.636505 | 1.799829  | -0.755847 |
| N | -3.194487 | 3.020609  | -0.610969 |
| C | -2.430252 | 3.753589  | 0.272999  |
| H | -3.034562 | 1.024853  | -1.393971 |
| H | -4.035221 | 3.343330  | -1.077398 |
| H | -2.680237 | 4.765802  | 0.553934  |
| H | -0.579960 | 3.127602  | 1.314989  |
| O | -0.483433 | 0.306551  | 2.629612  |
| H | -0.107030 | -0.458275 | 3.095679  |
| H | -0.855220 | 0.885417  | 3.315254  |

---

7 - LCu(II)(Im)(NMA)\_LB: B3LYP/6-311+g(2df,2p), Energy(B3LYP/SB)= -2891.95984

2 2

|    |          |          |          |
|----|----------|----------|----------|
| C  | -3.70321 | 1.83933  | -0.76392 |
| C  | -2.90105 | 0.74905  | -0.53131 |
| N  | -1.61851 | 1.21565  | -0.24494 |
| C  | -1.6568  | 2.54197  | -0.31157 |
| N  | -2.90323 | 2.95277  | -0.6235  |
| C  | -3.31019 | -0.69737 | -0.57201 |
| C  | -3.10553 | -1.42692 | -1.93643 |
| Cu | 0.03354  | 0.12444  | 0.10688  |
| N  | -0.62446 | -0.34365 | 2.02828  |
| N  | 1.67895  | -1.02996 | 0.32497  |
| C  | 2.46849  | -0.862   | 1.38298  |
| N  | 3.51433  | -1.70814 | 1.32598  |
| C  | 3.39722  | -2.4601  | 0.17745  |
| C  | 2.25422  | -2.03782 | -0.45665 |
| C  | 1.76447  | -2.53333 | -1.79064 |
| C  | 0.34267  | -3.11917 | -1.84058 |
| O  | -0.42643 | -0.82697 | -1.71193 |
| C  | -0.72559 | -2.0405  | -1.82357 |
| N  | -2.0084  | -2.40399 | -1.93483 |
| H  | 0.17275  | -3.81867 | -1.01134 |
| H  | 2.46098  | -3.31504 | -2.11    |
| H  | 1.83786  | -1.7332  | -2.53588 |
| H  | 2.30807  | -0.15633 | 2.18407  |
| H  | 4.25689  | -1.77873 | 2.01208  |
| H  | -2.23204 | -3.38141 | -2.0849  |
| H  | -4.00645 | -1.98792 | -2.19172 |
| H  | -4.37711 | -0.73807 | -0.32785 |
| H  | -2.80046 | -1.25783 | 0.21907  |

|   |          |          |          |
|---|----------|----------|----------|
| H | -0.81815 | 3.1997   | -0.14446 |
| H | -3.19701 | 3.9155   | -0.73971 |
| H | -4.75249 | 1.91276  | -1.00947 |
| H | 4.12348  | -3.21154 | -0.09521 |
| H | 0.23119  | -3.70608 | -2.76162 |
| H | -2.92776 | -0.70068 | -2.73515 |
| C | -0.53738 | -1.56621 | 2.67723  |
| C | -1.25613 | 0.47775  | 2.86126  |
| N | -1.56921 | -0.16784 | 4.00618  |
| C | -1.12428 | -1.46953 | 3.91013  |
| H | -1.49773 | 1.51266  | 2.6713   |
| H | -2.04644 | 0.23944  | 4.80241  |
| H | -1.26382 | -2.18962 | 4.70244  |
| H | -0.06538 | -2.42271 | 2.22058  |
| O | 1.24482  | 1.88784  | -0.12718 |
| C | 2.04677  | 2.31578  | -0.99965 |
| C | 2.21224  | 1.63249  | -2.33521 |
| C | 2.78282  | 4.16139  | 0.48612  |
| N | 2.79835  | 3.39731  | -0.7617  |
| H | 2.72969  | 0.67858  | -2.18523 |
| H | 1.22899  | 1.41262  | -2.76025 |
| H | 2.7878   | 2.22662  | -3.04996 |
| H | 3.40164  | 3.7259   | -1.50548 |
| H | 3.73628  | 4.68263  | 0.58835  |
| H | 1.97332  | 4.89949  | 0.48707  |
| H | 2.64872  | 3.48204  | 1.32941  |

---

8a - LDCu(II)<sup>+</sup> \_LB: B3LYP/6-311+g(2df,2p), Energy(B3LYP/SB)= -2948.63962

|     |          |           |           |
|-----|----------|-----------|-----------|
| 1 2 |          |           |           |
| C   | 0.932310 | -3.072842 | 2.518297  |
| C   | 0.585484 | -2.546100 | 1.296640  |
| N   | 0.672380 | -1.161460 | 1.365545  |
| C   | 1.055060 | -0.864626 | 2.596055  |
| N   | 1.230916 | -1.993690 | 3.325903  |
| C   | 0.098636 | -3.251124 | 0.063034  |
| C   | 1.159227 | -3.698287 | -0.965600 |
| Cu  | 0.216338 | 0.441096  | -0.135834 |
| N   | 1.908742 | 1.645918  | -0.124900 |
| C   | 1.759867 | 2.941897  | 0.141282  |
| N   | 2.927535 | 3.591481  | -0.049086 |
| C   | 3.876376 | 2.674784  | -0.451040 |
| C   | 3.237066 | 1.461192  | -0.495250 |
| C   | 3.863030 | 0.135774  | -0.808326 |
| C   | 3.261744 | -0.640299 | -2.012647 |
| O   | 0.884576 | -0.878059 | -1.593907 |
| C   | 2.014981 | -1.419648 | -1.643007 |



|   |           |           |           |
|---|-----------|-----------|-----------|
| N | 2.188750  | -2.714472 | -1.338819 |
| H | 4.025136  | -1.324249 | -2.400540 |
| H | 3.844312  | -0.508278 | 0.081394  |
| H | 4.919923  | 0.319460  | -1.027910 |
| H | 0.849198  | 3.417294  | 0.483166  |
| H | 3.071676  | 4.583578  | 0.089778  |
| H | 3.120458  | -3.087818 | -1.471163 |
| H | 1.712320  | -4.554964 | -0.570439 |
| H | -0.638117 | -2.617778 | -0.432835 |
| H | -0.430621 | -4.165813 | 0.355926  |
| H | 1.190733  | 0.133943  | 2.987310  |
| H | 1.502930  | -2.034883 | 4.299794  |
| H | 0.969886  | -4.088917 | 2.882704  |
| H | 4.900471  | 2.951822  | -0.652097 |
| H | 3.000725  | 0.052840  | -2.817739 |
| H | 0.639896  | -4.032066 | -1.872412 |
| O | -0.572229 | 1.662816  | 1.142241  |
| C | -1.524206 | 2.500581  | 0.816014  |
| O | -1.434072 | 3.716873  | 0.956108  |
| C | -2.837033 | 1.904994  | 0.265229  |
| H | -3.599262 | 2.121584  | 1.023581  |
| H | -3.123537 | 2.471901  | -0.630006 |
| N | -1.636678 | 0.122328  | -0.939866 |
| H | -1.753994 | -0.831979 | -1.292869 |
| H | -1.730039 | 0.708481  | -1.774308 |
| C | -2.767425 | 0.404491  | -0.019743 |
| H | -2.539098 | -0.117883 | 0.917244  |
| C | -4.031005 | -0.278322 | -0.596824 |
| N | -5.238194 | 0.191969  | -0.221260 |
| O | -3.892703 | -1.259382 | -1.332724 |
| H | -5.296179 | 1.025570  | 0.345741  |
| C | -6.480476 | -0.440424 | -0.664406 |
| H | -6.594625 | -0.353989 | -1.749499 |
| H | -6.479379 | -1.501228 | -0.399615 |
| H | -7.317176 | 0.056834  | -0.170648 |

---

8b - LDCu(II)<sup>+</sup>\_LB: B3LYP/6-311+g(2df,2p), Energy(B3LYP/SB)= -2948.63756

1 2

|    |           |           |           |
|----|-----------|-----------|-----------|
| C  | 4.661990  | -0.710166 | 0.494380  |
| C  | 4.020023  | -1.925750 | 0.563743  |
| N  | 4.911569  | -2.953804 | 0.320350  |
| C  | 6.075463  | -2.374144 | 0.115791  |
| N  | 5.977974  | -1.014902 | 0.209455  |
| C  | 2.578089  | -2.227686 | 0.841169  |
| C  | 1.896870  | -2.825000 | -0.404695 |
| Cu | -1.624078 | 0.300820  | -0.169486 |
| N  | -3.440615 | -0.556276 | -0.051289 |

|   |           |           |           |
|---|-----------|-----------|-----------|
| C | -4.503322 | 0.163431  | 0.306227  |
| N | -5.608604 | -0.603716 | 0.272764  |
| C | -5.248447 | -1.876680 | -0.122880 |
| C | -3.893332 | -1.843592 | -0.326925 |
| C | -3.015178 | -2.971063 | -0.775052 |
| C | -1.866252 | -3.329897 | 0.202797  |
| O | -0.526079 | -1.381688 | -0.387268 |
| C | -0.570980 | -2.615703 | -0.120876 |
| N | 0.545297  | -3.343662 | -0.137506 |
| H | -1.697997 | -4.411639 | 0.189843  |
| H | -2.600514 | -2.759502 | -1.769097 |
| H | -3.650816 | -3.853802 | -0.894154 |
| H | -4.473082 | 1.209656  | 0.572664  |
| H | -6.543440 | -0.289138 | 0.500990  |
| H | 0.464430  | -4.327612 | 0.088476  |
| H | 1.821535  | -2.080159 | -1.200713 |
| H | 2.052829  | -1.320450 | 1.159646  |
| H | 2.508977  | -2.952159 | 1.663328  |
| H | 7.007978  | -2.879605 | -0.096265 |
| H | 6.735365  | -0.352850 | 0.107933  |
| H | 4.309499  | 0.305594  | 0.604369  |
| H | -5.967435 | -2.675214 | -0.227803 |
| H | -2.150946 | -3.070341 | 1.230683  |
| H | 2.491064  | -3.662067 | -0.778376 |
| O | -2.432877 | 1.945334  | 0.314676  |
| C | -1.889859 | 3.068633  | 0.741681  |
| O | -2.564510 | 4.029603  | 1.073589  |
| C | -0.360456 | 3.124475  | 0.813751  |
| H | -0.079254 | 4.157017  | 1.034929  |
| H | -0.007809 | 2.506355  | 1.651409  |
| N | 0.133458  | 1.187580  | -0.659694 |
| H | 0.327040  | 0.930200  | -1.630356 |
| H | 0.884599  | 0.729034  | -0.129303 |
| C | 0.324002  | 2.649057  | -0.479789 |
| H | -0.121891 | 3.159058  | -1.340912 |
| C | 1.842045  | 2.923840  | -0.405843 |
| N | 2.250945  | 4.157945  | -0.756684 |
| O | 2.604011  | 2.037075  | -0.007315 |
| H | 1.566399  | 4.832453  | -1.073334 |
| C | 3.647417  | 4.579370  | -0.646335 |
| H | 3.990276  | 4.504885  | 0.389932  |
| H | 4.285587  | 3.951091  | -1.274428 |
| H | 3.722902  | 5.615945  | -0.978476 |

9 - LDCu(II) (**Im**)<sup>+</sup>\_LB , 6-311+g(2df,2p), Energy(B3LYP/SB)= -3174.89184

1 2

C 3.034347 -2.541540 1.752830

|    |           |           |           |
|----|-----------|-----------|-----------|
| C  | 2.381807  | -2.037853 | 0.653349  |
| N  | 1.568213  | -0.987416 | 1.069592  |
| C  | 1.724148  | -0.872592 | 2.379781  |
| N  | 2.606884  | -1.792281 | 2.832762  |
| C  | 2.481897  | -2.457586 | -0.782945 |
| C  | 3.733985  | -1.926649 | -1.520739 |
| Cu | 0.010924  | -0.063906 | 0.007399  |
| N  | -1.478420 | -0.082403 | 1.838295  |
| N  | 0.532592  | 1.914710  | 0.429299  |
| C  | -0.483973 | 2.760066  | 0.577669  |
| N  | -0.030441 | 4.026814  | 0.689725  |
| C  | 1.345818  | 3.998616  | 0.606609  |
| C  | 1.697874  | 2.680521  | 0.436810  |
| C  | 3.097794  | 2.158845  | 0.279482  |
| C  | 3.563736  | 1.882474  | -1.183586 |
| O  | 2.173134  | 0.281480  | -2.367019 |
| C  | 3.185803  | 0.495739  | -1.688374 |
| N  | 4.006821  | -0.507615 | -1.291240 |
| H  | 4.654042  | 1.997162  | -1.219794 |
| H  | 3.234355  | 1.258890  | 0.888621  |
| H  | 3.766624  | 2.919631  | 0.696648  |
| H  | -1.531800 | 2.493958  | 0.564569  |
| H  | -0.609065 | 4.849283  | 0.803577  |
| H  | 4.830464  | -0.268382 | -0.756602 |
| H  | 4.626290  | -2.467953 | -1.193517 |
| H  | 1.579605  | -2.126421 | -1.297835 |
| H  | 2.498850  | -3.552002 | -0.850468 |
| H  | 1.203125  | -0.175395 | 3.018860  |
| H  | 2.874147  | -1.929805 | 3.798644  |
| H  | 3.730118  | -3.359791 | 1.863305  |
| H  | 1.946708  | 4.892570  | 0.681390  |
| H  | 3.133779  | 2.620812  | -1.865314 |
| H  | 3.613606  | -2.102725 | -2.595005 |
| C  | -1.715324 | 0.735866  | 2.930113  |
| C  | -2.259037 | -1.143020 | 2.003079  |
| N  | -2.980350 | -1.030747 | 3.148600  |
| C  | -2.646705 | 0.162193  | 3.757434  |
| H  | -2.319456 | -1.993230 | 1.336012  |
| H  | -3.643509 | -1.713340 | 3.491959  |
| H  | -3.088260 | 0.482625  | 4.688953  |
| H  | -1.206612 | 1.680971  | 3.057704  |
| N  | -0.631001 | 0.652404  | -1.833290 |
| C  | -1.797417 | 0.040404  | -2.503482 |
| C  | -1.635547 | -1.484143 | -2.583102 |
| C  | -1.664372 | -2.140379 | -1.199922 |
| C  | -3.045239 | 0.592153  | -1.774475 |
| C  | -5.352503 | 0.257443  | -1.032337 |
| O  | -2.600080 | -2.888799 | -0.897515 |
| O  | -0.697621 | -1.837743 | -0.382818 |
| O  | -3.028025 | 1.764302  | -1.374130 |
| N  | -4.119478 | -0.210411 | -1.658572 |
| H  | -6.088651 | -0.546659 | -1.079060 |
| H  | -5.184433 | 0.538347  | 0.013406  |
| H  | -5.736559 | 1.131502  | -1.565234 |
| H  | -4.011384 | -1.206751 | -1.810623 |

|   |           |           |           |
|---|-----------|-----------|-----------|
| H | -1.867148 | 0.429148  | -3.531522 |
| H | -0.677519 | -1.695278 | -3.074380 |
| H | -2.419926 | -1.919171 | -3.208893 |
| H | -0.834840 | 1.647581  | -1.731128 |
| H | 0.225089  | 0.569037  | -2.392347 |

---

$2^1(\text{H}_2\text{O})$  - DCu(I) (H2O)\_LB , 6-311+g(2df,2p), Energy(B3LYP/SB)= -2248.006212

|     |           |           |           |
|-----|-----------|-----------|-----------|
| 0 1 |           |           |           |
| C   | 0.934411  | -0.042724 | -0.273623 |
| H   | 0.855305  | 0.365429  | -1.288015 |
| C   | 0.474285  | 1.041657  | 0.729077  |
| C   | 2.387954  | -0.467253 | 0.009763  |
| H   | 0.348280  | 0.587839  | 1.719184  |
| H   | 1.253544  | 1.806836  | 0.795861  |
| O   | 2.634263  | -1.505244 | 0.627565  |
| N   | 3.346648  | 0.371299  | -0.453317 |
| H   | 3.058088  | 1.238886  | -0.887786 |
| C   | 4.761537  | 0.180967  | -0.154878 |
| H   | 5.354453  | 0.743481  | -0.879943 |
| H   | 5.009303  | 0.521630  | 0.857882  |
| H   | 5.005664  | -0.880598 | -0.232233 |
| N   | 0.070091  | -1.262484 | -0.210249 |
| H   | 0.287030  | -1.852238 | -1.015484 |
| H   | 0.407265  | -1.809002 | 0.590472  |
| C   | -0.835757 | 1.725324  | 0.251566  |
| O   | -1.918921 | 1.151236  | 0.664611  |
| O   | -0.740656 | 2.695032  | -0.507297 |
| Cu  | -1.842253 | -0.860180 | -0.082085 |
| O   | -3.799857 | -0.385891 | -0.167145 |
| H   | -3.555136 | 0.546466  | 0.078209  |
| H   | -4.248850 | -0.354084 | -1.026021 |

---

$2^1(\mathbf{Im})$  - DCu(I) (Im)\_LB , 6-311+g(2df,2p), Energy(B3LYP/SB)= -2397.8328

|     |          |           |           |
|-----|----------|-----------|-----------|
| 0 1 |          |           |           |
| C   | 2.118107 | -0.648524 | -1.076612 |
| H   | 2.858758 | -1.140709 | -1.725496 |
| C   | 1.877024 | 0.766964  | -1.629839 |
| C   | 2.717906 | -0.790788 | 0.342236  |
| H   | 2.849369 | 1.232415  | -1.820725 |
| H   | 1.361817 | 0.671114  | -2.594088 |
| O   | 2.720340 | -1.917082 | 0.859213  |
| N   | 3.271801 | 0.298398  | 0.905903  |
| H   | 2.975649 | 1.224488  | 0.573235  |
| C   | 3.866109 | 0.219808  | 2.234224  |
| H   | 4.358929 | 1.171115  | 2.446744  |
| H   | 3.108358 | 0.025274  | 3.003377  |

|    |           |           |           |
|----|-----------|-----------|-----------|
| H  | 4.601372  | -0.588617 | 2.267016  |
| N  | 0.872252  | -1.481328 | -1.085313 |
| H  | 0.725231  | -1.844675 | -2.027617 |
| H  | 1.077872  | -2.291657 | -0.491250 |
| C  | 1.051813  | 1.680959  | -0.688764 |
| O  | 1.687733  | 2.512013  | -0.005995 |
| O  | -0.207541 | 1.468693  | -0.659017 |
| Cu | -0.798867 | -0.567842 | -0.513822 |
| C  | -3.604981 | -1.062670 | 0.432693  |
| C  | -4.319360 | 0.995589  | 0.848369  |
| C  | -3.033148 | 1.037272  | 0.383148  |
| H  | -3.600752 | -2.139610 | 0.353420  |
| H  | -5.554914 | -0.724692 | 1.171796  |
| H  | -5.001221 | 1.772444  | 1.158289  |
| H  | -2.366900 | 1.871247  | 0.212219  |
| N  | -2.600872 | -0.254973 | 0.127247  |
| N  | -4.667681 | -0.343721 | 0.873246  |

$2^1(\mathbf{Im})_2$  - DCu (I) ( $\mathbf{Im})_2$  \_LB , 6-311+g(2df,2p), Energy(B3LYP/SB)= -2624.077404

|     |           |           |           |
|-----|-----------|-----------|-----------|
| O 1 |           |           |           |
| C   | -1.415631 | -2.186345 | -0.507832 |
| H   | -1.649399 | -3.182828 | -0.916693 |
| C   | -1.083691 | -2.384589 | 0.984661  |
| C   | -2.655104 | -1.348029 | -0.892929 |
| H   | -1.930547 | -2.894259 | 1.457706  |
| H   | -0.216669 | -3.053571 | 1.044949  |
| O   | -2.885381 | -1.174155 | -2.097439 |
| N   | -3.456927 | -0.908900 | 0.097139  |
| H   | -3.047927 | -0.822518 | 1.039700  |
| C   | -4.642804 | -0.124260 | -0.212035 |
| H   | -5.212404 | 0.019215  | 0.709673  |
| H   | -4.384244 | 0.855314  | -0.635311 |
| H   | -5.261622 | -0.652987 | -0.942472 |
| N   | -0.266159 | -1.611259 | -1.262397 |
| H   | 0.449633  | -2.329521 | -1.371486 |
| H   | -0.616485 | -1.401641 | -2.200346 |
| C   | -0.762478 | -1.081765 | 1.751240  |
| O   | -1.735198 | -0.467978 | 2.274123  |
| O   | 0.446780  | -0.701072 | 1.747525  |
| Cu  | 0.750699  | 0.070237  | -0.440649 |
| C   | -0.722030 | 2.218115  | 0.903435  |
| C   | -0.672827 | 4.060821  | -0.339724 |
| C   | -0.016128 | 3.041123  | -0.977784 |
| H   | -0.954422 | 1.535198  | 1.714570  |
| H   | -1.644403 | 3.995304  | 1.568278  |
| H   | -0.861620 | 5.087408  | -0.614552 |

|   |           |           |           |
|---|-----------|-----------|-----------|
| H | 0.474602  | 3.051276  | -1.940037 |
| N | -0.051945 | 1.900788  | -0.196774 |
| N | -1.114127 | 3.518279  | 0.852500  |
| H | 5.243654  | -1.063681 | 1.504902  |
| H | 6.053694  | -0.429322 | -0.839174 |
| H | 3.726829  | 0.208207  | -2.206036 |
| N | 2.780288  | -0.278904 | -0.333109 |
| C | 5.020247  | -0.428415 | -0.527228 |
| C | 3.856984  | -0.118909 | -1.184434 |
| N | 4.631990  | -0.782340 | 0.751203  |
| C | 3.278174  | -0.679002 | 0.827084  |
| H | 2.681320  | -0.888944 | 1.704813  |

**6<sup>I</sup>** - LCu(I)\_LB , 6-311+g(2df,2p), Energy(B3LYP/SB)= -2417.46767

|    |           |           |           |
|----|-----------|-----------|-----------|
| 1  | 1         |           |           |
| 6  | 4.033387  | -0.334136 | -0.032800 |
| 6  | 2.750578  | -0.033986 | -0.417571 |
| 7  | 1.903193  | -1.002693 | 0.122544  |
| 6  | 2.661844  | -1.852632 | 0.810139  |
| 7  | 3.954546  | -1.476310 | 0.738679  |
| 6  | 2.256923  | 1.086683  | -1.281432 |
| 6  | 1.842032  | 2.381001  | -0.545601 |
| 29 | 0.017079  | -1.041056 | -0.043849 |
| 7  | -1.873988 | -1.020091 | -0.127155 |
| 6  | -2.662511 | -1.716539 | -0.939446 |
| 7  | -3.943503 | -1.326425 | -0.781782 |
| 6  | -3.982170 | -0.332972 | 0.175536  |
| 6  | -2.687242 | -0.137080 | 0.580541  |
| 6  | -2.140450 | 0.827286  | 1.590945  |
| 6  | -1.654635 | 2.191006  | 1.025474  |
| 8  | -0.822280 | 1.812493  | -1.207337 |
| 6  | -0.562456 | 2.075540  | -0.033728 |
| 7  | 0.728113  | 2.240088  | 0.395533  |
| 1  | -1.323327 | 2.806794  | 1.870228  |
| 1  | -1.320642 | 0.342169  | 2.136386  |
| 1  | -2.919022 | 1.038210  | 2.332225  |
| 1  | -2.347456 | -2.486759 | -1.627685 |
| 1  | -4.739206 | -1.706162 | -1.278932 |
| 1  | 0.876079  | 2.565548  | 1.341648  |
| 1  | 2.689690  | 2.777166  | 0.020943  |
| 1  | 1.411513  | 0.742929  | -1.885118 |
| 1  | 3.051809  | 1.363965  | -1.984134 |
| 1  | 2.316388  | -2.723772 | 1.347032  |
| 1  | 4.733629  | -1.964955 | 1.161791  |
| 1  | 4.975233  | 0.147142  | -0.249134 |
| 1  | -4.905784 | 0.137188  | 0.477271  |
| 1  | -2.495084 | 2.704986  | 0.549305  |
| 1  | 1.568794  | 3.119239  | -1.308574 |

**6<sup>I</sup> (Im)** - LCu(I) (Im)\_LB , 6-311+g(2df,2p), Energy(B3LYP/SB)= -2643.71497

|     |           |           |           |
|-----|-----------|-----------|-----------|
| I 1 |           |           |           |
| C   | -0.577374 | 3.949008  | 0.082486  |
| C   | -0.666903 | 2.664660  | -0.399591 |
| N   | 0.233734  | 1.868476  | 0.304869  |
| C   | 0.842746  | 2.659102  | 1.181388  |
| N   | 0.375290  | 3.924160  | 1.080774  |
| C   | -1.550162 | 2.125427  | -1.486087 |
| C   | -3.033706 | 1.964732  | -1.084747 |
| Cu  | 0.660067  | -0.058582 | 0.089352  |
| N   | -0.086000 | -1.886399 | -0.000878 |
| C   | 0.377152  | -2.823925 | -0.819702 |
| N   | -0.347763 | -3.957762 | -0.694920 |
| C   | -1.325653 | -3.738974 | 0.252503  |
| C   | -1.165135 | -2.443948 | 0.677049  |
| C   | -1.990920 | -1.662741 | 1.655743  |
| C   | -3.351639 | -1.167918 | 1.093555  |
| O   | -2.983250 | -0.819304 | -1.264950 |
| C   | -3.187711 | -0.318038 | -0.160985 |
| N   | -3.240658 | 1.035555  | 0.018641  |
| H   | -3.876302 | -0.619334 | 1.885453  |
| H   | -1.401497 | -0.803941 | 1.998696  |
| H   | -2.196865 | -2.277284 | 2.540010  |
| H   | 1.212523  | -2.716549 | -1.495883 |
| H   | -0.207268 | -4.810893 | -1.220106 |
| H   | -3.421587 | 1.404567  | 0.941619  |
| H   | -3.459963 | 2.929390  | -0.792400 |
| H   | -1.171870 | 1.149525  | -1.806236 |
| H   | -1.509195 | 2.787812  | -2.360212 |
| H   | 1.610266  | 2.358226  | 1.879422  |
| H   | 0.684921  | 4.715198  | 1.630438  |
| H   | -1.085638 | 4.858869  | -0.200135 |
| H   | -2.043018 | -4.499590 | 0.521292  |
| H   | -3.970369 | -2.028247 | 0.820554  |
| H   | -3.589449 | 1.596433  | -1.952450 |
| C   | 3.580922  | -1.074114 | 0.523463  |
| C   | 4.921321  | 0.229858  | -0.663941 |
| C   | 3.616742  | 0.616011  | -0.827907 |
| H   | 3.263506  | -1.862959 | 1.190727  |
| H   | 5.676650  | -1.369304 | 0.537810  |
| H   | 5.846988  | 0.606353  | -1.072188 |
| H   | 3.221480  | 1.420050  | -1.431616 |
| N   | 2.786537  | -0.204015 | -0.083503 |
| N   | 4.879238  | -0.845708 | 0.199909  |

---

$6^1(\mathbf{Im})(\text{H}_{14}\text{H}_{13}) - \text{LCu}(\text{I})(\mathbf{Im})\_LB$ , 6-311+g(2df,2p), Energy(B3LYP/SB)= -2643.70101

|     |          |         |          |
|-----|----------|---------|----------|
| I 1 |          |         |          |
| C   | -1.62536 | 3.56643 | 0.14306  |
| C   | -1.67028 | 2.19973 | 0.25325  |
| N   | -2.96317 | 1.78509 | -0.07264 |
| C   | -3.66706 | 2.87861 | -0.36642 |
| N   | -2.88641 | 3.96965 | -0.24771 |
| C   | -0.56323 | 1.25675 | 0.60832  |
| C   | 0.29223  | 0.84339 | -0.61639 |
| Cu  | -3.6278  | 0.0171  | -0.03888 |

|   |          |          |          |
|---|----------|----------|----------|
| N | 6.13579  | -1.81575 | -0.42241 |
| C | 7.34808  | -2.27246 | -0.18634 |
| N | 8.20086  | -1.26687 | 0.16688  |
| C | 7.47587  | -0.09062 | 0.15389  |
| C | 6.19968  | -0.44904 | -0.21534 |
| C | 4.99138  | 0.41879  | -0.40248 |
| C | 3.83321  | 0.00356  | 0.5344   |
| O | 2.52753  | 2.0394   | 0.4628   |
| C | 2.58587  | 0.82516  | 0.26841  |
| N | 1.50243  | 0.14073  | -0.22747 |
| H | 4.1306   | 0.17548  | 1.57535  |
| H | 4.65144  | 0.34418  | -1.44491 |
| H | 5.24426  | 1.46853  | -0.22233 |
| H | 7.66268  | -3.30516 | -0.25638 |
| H | 9.18153  | -1.36288 | 0.39258  |
| H | 1.59374  | -0.84623 | -0.42435 |
| H | -0.2804  | 0.19848  | -1.29136 |
| H | -0.97258 | 0.36378  | 1.09766  |
| H | 0.10301  | 1.74543  | 1.32471  |
| H | -4.70863 | 2.90959  | -0.65008 |
| H | -3.18289 | 4.92435  | -0.40789 |
| H | -0.81839 | 4.26449  | 0.30809  |
| H | 7.92195  | 0.86309  | 0.39552  |
| H | 3.64369  | -1.069   | 0.41673  |
| H | 0.57597  | 1.74579  | -1.16834 |
| C | -4.57346 | -2.54699 | -1.01049 |
| C | -5.08899 | -3.69901 | 0.81261  |
| C | -4.62414 | -2.4636  | 1.1686   |
| H | -4.44096 | -2.30454 | -2.05444 |
| H | -5.32838 | -4.50672 | -1.15237 |
| H | -5.43562 | -4.53501 | 1.40034  |
| H | -4.49976 | -2.04277 | 2.15478  |
| N | -4.30364 | -1.74976 | 0.0214   |
| N | -5.04845 | -3.72971 | -0.56646 |

---

7<sup>I</sup> - LCu(I) (NMA)\_LB , 6-311+g(2df,2p), Energy(B3LYP/SB)= -2666.02238

|     |           |           |           |
|-----|-----------|-----------|-----------|
| 1 1 |           |           |           |
| C   | -1.121143 | 4.036410  | -0.146750 |
| C   | -1.321096 | 2.712259  | -0.450095 |
| N   | -0.145924 | 2.020783  | -0.159286 |
| C   | 0.729826  | 2.906141  | 0.304144  |
| N   | 0.172538  | 4.135688  | 0.328985  |
| C   | -2.540630 | 2.047201  | -1.013570 |
| C   | -3.575522 | 1.556074  | 0.023721  |
| Cu  | 0.190171  | 0.143141  | -0.337596 |
| N   | 0.042551  | -1.750360 | -0.604449 |
| C   | 0.396627  | -2.442266 | -1.681056 |
| N   | 0.042327  | -3.738025 | -1.537548 |
| C   | -0.572995 | -3.885108 | -0.311590 |
| C   | -0.578521 | -2.641218 | 0.266876  |
| C   | -1.161191 | -2.198693 | 1.576525  |
| C   | -2.675240 | -1.853053 | 1.534945  |

---



|   |           |           |           |
|---|-----------|-----------|-----------|
| O | -3.243536 | -1.124200 | -0.692847 |
| C | -3.041546 | -0.813238 | 0.479029  |
| N | -3.103197 | 0.487060  | 0.901251  |
| H | -2.978119 | -1.526745 | 2.537574  |
| H | -0.595791 | -1.328899 | 1.933783  |
| H | -1.021880 | -2.989710 | 2.322393  |
| H | 0.896444  | -2.048911 | -2.553826 |
| H | 0.190164  | -4.468823 | -2.221529 |
| H | -3.016185 | 0.681344  | 1.889346  |
| H | -3.894240 | 2.386044  | 0.661529  |
| H | -2.241804 | 1.196830  | -1.634711 |
| H | -3.057898 | 2.754661  | -1.673344 |
| H | 1.741461  | 2.675487  | 0.602725  |
| H | 0.634510  | 4.985717  | 0.624667  |
| H | -1.765509 | 4.897747  | -0.239354 |
| H | -0.955924 | -4.835799 | 0.027280  |
| H | -3.246454 | -2.754049 | 1.292563  |
| H | -4.451123 | 1.190179  | -0.523223 |
| C | 3.557017  | -0.228766 | 0.651487  |
| C | 5.119330  | 1.122603  | -0.704028 |
| H | 5.558701  | -0.581466 | 0.500844  |
| H | 6.110601  | 0.959660  | -1.131521 |
| N | 4.801140  | 0.005096  | 0.178649  |
| O | 2.594387  | 0.492380  | 0.334815  |
| H | 5.117472  | 2.073184  | -0.158379 |
| H | 4.383965  | 1.180681  | -1.510188 |
| C | 3.390592  | -1.410982 | 1.584271  |
| H | 4.311369  | -1.982096 | 1.735783  |
| H | 3.037051  | -1.050352 | 2.556078  |
| H | 2.622320  | -2.077102 | 1.179367  |

---

**8a<sup>1</sup>** - LDCu(I)\_LB , 6-311+g(2df,2p), Energy(B3LYP/SB)=-2948.82952

|     |           |           |           |
|-----|-----------|-----------|-----------|
| 0 1 |           |           |           |
| C   | 4.460217  | -0.567429 | 0.359304  |
| C   | 4.199198  | -1.911065 | 0.520839  |
| N   | 5.335843  | -2.652508 | 0.245651  |
| C   | 6.267530  | -1.776076 | -0.067554 |
| N   | 5.787205  | -0.497924 | -0.016218 |
| C   | 2.898954  | -2.569063 | 0.875172  |
| C   | 2.084376  | -2.917076 | -0.387575 |
| Cu  | -1.801418 | 0.411623  | -0.626757 |
| N   | -3.380682 | -0.694372 | -0.399712 |
| C   | -4.488192 | -0.068976 | -0.019600 |
| N   | -5.453513 | -0.971866 | 0.271972  |
| C   | -4.933916 | -2.238249 | 0.073662  |
| C   | -3.636098 | -2.057296 | -0.340603 |
| C   | -2.623182 | -3.111608 | -0.678976 |
| C   | -1.613846 | -3.480322 | 0.459336  |
| O   | -0.170540 | -1.543243 | 0.555917  |
| C   | -0.281808 | -2.751040 | 0.327776  |
| N   | 0.770366  | -3.498055 | -0.107088 |

|   |           |           |           |
|---|-----------|-----------|-----------|
| H | -1.451941 | -4.565075 | 0.450519  |
| H | -2.071622 | -2.803906 | -1.575505 |
| H | -3.170826 | -4.021714 | -0.948680 |
| H | -4.570889 | 1.007727  | 0.073942  |
| H | -6.386380 | -0.748933 | 0.590512  |
| H | 0.641013  | -4.491008 | -0.242155 |
| H | 1.933043  | -2.008794 | -0.979850 |
| H | 2.297275  | -1.906480 | 1.504774  |
| H | 3.099393  | -3.484969 | 1.443691  |
| H | 7.292438  | -2.004557 | -0.328373 |
| H | 6.304941  | 0.349162  | -0.204548 |
| H | 3.841676  | 0.315761  | 0.447289  |
| H | -5.517591 | -3.131814 | 0.237915  |
| H | -2.042744 | -3.223108 | 1.432815  |
| H | 2.636905  | -3.631374 | -1.005310 |
| O | -2.701161 | 2.283464  | -0.020798 |
| C | -2.121045 | 2.957854  | 0.903615  |
| O | -2.660355 | 3.636480  | 1.788624  |
| C | -0.560819 | 2.902289  | 0.935090  |
| H | -0.211810 | 3.863598  | 1.325619  |
| H | -0.257299 | 2.147844  | 1.675047  |
| N | 0.039398  | 1.158242  | -0.754622 |
| H | 0.488237  | 0.997427  | -1.656927 |
| H | 0.593512  | 0.612114  | -0.089864 |
| C | 0.133878  | 2.595126  | -0.410191 |
| H | -0.385553 | 3.146358  | -1.202961 |
| C | 1.607664  | 3.033420  | -0.363756 |
| N | 1.827865  | 4.362608  | -0.539980 |
| O | 2.527869  | 2.232030  | -0.173391 |
| H | 1.027268  | 4.976194  | -0.616099 |
| C | 3.147233  | 4.960531  | -0.386248 |
| H | 3.483688  | 4.930865  | 0.657289  |
| H | 3.873757  | 4.418876  | -0.997981 |
| H | 3.101878  | 5.999898  | -0.719773 |

---

**8b<sup>†</sup>** - LDCu (I)\_LB , 6-311+g(2df,2p), Energy(B3LYP/SB)= -2948.83683

0 1

|    |           |           |           |
|----|-----------|-----------|-----------|
| C  | -2.299290 | -3.665390 | -1.446230 |
| C  | -2.058234 | -2.730127 | -0.467857 |
| N  | -1.099033 | -1.836516 | -0.932368 |
| C  | -0.772901 | -2.226262 | -2.157705 |
| N  | -1.478108 | -3.330345 | -2.506592 |
| C  | -2.700243 | -2.635736 | 0.882936  |
| C  | -3.705446 | -1.472215 | 1.046078  |
| Cu | -0.129068 | -0.175032 | -0.240204 |
| N  | -1.253776 | 1.690491  | -0.678716 |
| C  | -0.794355 | 2.149663  | -1.838579 |

|   |           |           |           |
|---|-----------|-----------|-----------|
| N | -0.955699 | 3.488582  | -1.922230 |
| C | -1.544544 | 3.922008  | -0.749954 |
| C | -1.738044 | 2.796706  | 0.015298  |
| C | -2.434659 | 2.732383  | 1.351181  |
| C | -1.936506 | 1.664666  | 2.353501  |
| O | -2.896829 | -0.266164 | 3.424441  |
| C | -2.677116 | 0.325864  | 2.365637  |
| N | -3.082497 | -0.162752 | 1.156936  |
| H | -2.024737 | 2.045086  | 3.374642  |
| H | -3.514145 | 2.593743  | 1.196068  |
| H | -2.329155 | 3.718807  | 1.817680  |
| H | -0.278049 | 1.563165  | -2.585906 |
| H | -0.587387 | 4.065497  | -2.666569 |
| H | -2.708790 | 0.268170  | 0.316539  |
| H | -4.401351 | -1.454652 | 0.199497  |
| H | -1.937604 | -2.543480 | 1.665700  |
| H | -3.236966 | -3.574096 | 1.072831  |
| H | -0.035698 | -1.732354 | -2.777217 |
| H | -1.401403 | -3.823769 | -3.385047 |
| H | -2.960099 | -4.519060 | -1.475049 |
| H | -1.780697 | 4.960829  | -0.572207 |
| H | -0.871884 | 1.457051  | 2.184994  |
| H | -4.279395 | -1.629960 | 1.962390  |
| O | 1.239560  | -0.129968 | -2.052332 |
| C | 2.085644  | 0.827169  | -1.957955 |
| O | 2.192988  | 1.806169  | -2.718703 |
| C | 3.076546  | 0.772792  | -0.761821 |
| H | 4.075964  | 0.599987  | -1.181051 |
| H | 3.119551  | 1.768347  | -0.300733 |
| N | 1.509000  | 0.025037  | 1.015770  |
| H | 1.425647  | -0.599691 | 1.819048  |
| H | 1.618543  | 0.948088  | 1.440917  |
| C | 2.774461  | -0.290145 | 0.307660  |
| H | 2.629107  | -1.253709 | -0.193144 |
| C | 3.931971  | -0.390509 | 1.317173  |
| N | 5.015688  | -1.101441 | 0.897717  |
| O | 3.868964  | 0.138325  | 2.427858  |
| H | 5.019447  | -1.455235 | -0.050010 |
| C | 6.244595  | -1.191928 | 1.673912  |
| H | 6.922711  | -0.354850 | 1.463184  |
| H | 5.989669  | -1.171560 | 2.735128  |
| H | 6.751913  | -2.132365 | 1.440832  |

---

## Supporting Information

TableS2. Primary properties calculated at the B3LYP/SB optimized structures of all species: SB = 6-31+G(d); LB = 6-311+(2df,2p)

| Compound                                                                     | E(B3LYP/SB) <sup>a</sup> | E(B3LYP/LB) <sup>a</sup> | ZPE <sup>a</sup> | H <sub>0</sub> <sup>a</sup> | S <sub>298</sub> <sup>b</sup> | N <sup>c</sup> | ΔG <sub>sol</sub> <sup>d</sup> | E(MP2/SB) <sup>a</sup> | E('MP2/LB') <sup>a,e</sup> |
|------------------------------------------------------------------------------|--------------------------|--------------------------|------------------|-----------------------------|-------------------------------|----------------|--------------------------------|------------------------|----------------------------|
| H <sub>2</sub> O                                                             | -76.42257                | -76.46243                | 0.021<br>10      | 0.024<br>87                 | 45.1                          | 1              | -3.9                           | -76.20977              | -76.24963                  |
| H <sup>+</sup> (aq)                                                          | 0.00000                  | 0.00000                  | 0.000<br>00      | 0.002<br>36                 | 26.0                          | 1              | -<br>264.6                     | 0.0000                 | 0.0000                     |
| Im                                                                           | -226.22693               | -226.29723               | 0.071<br>15      | 0.075<br>87                 | 65.3                          | 1              | -10.1                          | -<br>1943.3214<br>7    | -225.60587                 |
| Cu(H <sub>2</sub> O) <sub>5</sub> <sup>2+</sup>                              | -<br>2021.91938          | -<br>2022.25692          | 0.123<br>39      | 0.139<br>23                 | 118.<br>7                     | 1              | -<br>228.6                     | -<br>2019.5863<br>6    | -2019.92390                |
| Cu(Im)(H <sub>2</sub> O) <sub>4</sub> <sup>2+</sup>                          | -<br>2171.78282          | -<br>2172.15278          | 0.172<br>63      | 0.190<br>56                 | 132.<br>2                     | 2              | -<br>198.8                     | -<br>2168.9704<br>4    | -2169.34040                |
| Cu(Im) <sub>2</sub> (H <sub>2</sub> O) <sub>3</sub> <sup>2+</sup> -<br>trans | -<br>2321.63504          | -<br>2322.03784          | 0.221<br>88      | 0.241<br>89                 | 156.<br>4                     | 4              | -<br>175.6                     | -<br>2318.3479<br>1    | -2318.75072                |
| Cu(Im) <sub>2</sub> (H <sub>2</sub> O) <sub>3</sub> <sup>2+</sup> -<br>cis   | -<br>2321.63227          | -<br>2322.03455          | 0.222<br>01      | 0.241<br>97                 | 145.<br>9                     | 8              | -<br>175.6                     | -<br>2318.3455<br>6    | -2318.74783                |
| NMA                                                                          | -248.53733               | -248.62030               | 0.102<br>13      | 0.109<br>79                 | 81.3                          | 1              | -9.3                           | -<br>247.74753         | -247.83050                 |
| Cu(H <sub>2</sub> O) <sub>3</sub> <sup>+</sup>                               | -<br>1869.45158          | -<br>1869.71710          | 0.072<br>66      | 0.083<br>76                 | 97.7                          | 1              | -75.0                          | -<br>1867.5459<br>1    | -1867.81143                |
| Cu(Im)(H <sub>2</sub> O) <sup>+</sup>                                        | -<br>1942.85198          | -<br>1943.11320          | 0.098<br>33      | 0.107<br>78                 | 92.4                          | 1              | -45.0                          | -<br>1940.6826<br>4    | -1940.94386                |
| Cu(Im) <sub>2</sub> <sup>+</sup>                                             | -<br>2092.69470          | -<br>2092.98826          | 0.147<br>75      | 0.159<br>02                 | 105.<br>7                     | 1              | -45.7                          | -<br>2090.0525         | -2090.34612                |

|                                                                                         |            |            |       |       |      |    |       |            |             |
|-----------------------------------------------------------------------------------------|------------|------------|-------|-------|------|----|-------|------------|-------------|
|                                                                                         |            |            |       |       |      |    |       | 6          |             |
| <b>Cu(Im)(H<sub>13</sub>H<sub>14</sub>)<sup>+</sup></b>                                 | -          | -          | 0.340 | 0.364 | 180. | 28 | -57.7 | -          | -2639.83346 |
|                                                                                         | 2643.70101 | 2644.16174 | 82    | 71    | 3    | 8  |       | 2639.37273 |             |
| <b>1 - DH (Asp1)</b>                                                                    | -531.75258 | -531.92889 | 0.163 | 0.175 | 104. | 1  | -43.0 | -          | -530.36656  |
|                                                                                         |            |            | 84    | 68    | 1    | 1  |       | 530.19025  |             |
| <b>2a(H<sub>2</sub>O)<sub>2</sub> - DCu(II)(H<sub>2</sub>O)<sub>2</sub><sup>+</sup></b> | -          | -          | 0.205 | 0.223 | 135. | 1  | -88.4 | -          | -2321.34485 |
|                                                                                         | 2324.21365 | 2324.61257 | 76    | 98    | 5    | 1  |       | 2320.94593 |             |
| <b>2b(H<sub>2</sub>O)<sub>2</sub> - DCu(II)(H<sub>2</sub>O)<sub>2</sub><sup>+</sup></b> | -          | -          | 0.204 | 0.223 | 140. | 2  | -91.5 | -          | -2321.32447 |
|                                                                                         | 2324.20127 | 2324.60095 | 97    | 70    | 1    | 2  |       | 2320.92479 |             |
| <b>2c(H<sub>2</sub>O)<sub>2</sub> - DCu(II)(H<sub>2</sub>O)<sub>2</sub><sup>+</sup></b> | -          | -          | 0.204 | 0.222 | 135. | 1  | -82.8 | -          | -2321.31086 |
|                                                                                         | 2324.18033 | 2324.58006 | 69    | 89    | 6    | 1  |       | 2320.91112 |             |
| <b>2a(Im)(H<sub>2</sub>O) - DCu(II) (Im) (H<sub>2</sub>O)<sup>+</sup></b>               | -          | -          | 0.255 | 0.275 | 147. | 2  | -76.2 | -          | -2470.73358 |
|                                                                                         | 2474.04439 | 2474.47677 | 16    | 24    | 7    | 2  |       | 2470.30121 |             |
| <b>2b(Im)(H<sub>2</sub>O) - DCu(II) (Im) (H<sub>2</sub>O)<sup>+</sup></b>               | -          | -          | 0.254 | 0.274 | 151. | 2  | -73.1 | -          | -2470.74089 |
|                                                                                         | 2474.04747 | 2474.47958 | 11    | 75    | 1    | 2  |       | 2470.30877 |             |
| <b>2a(Im)<sub>2</sub> - DCu(II) (Im)<sub>2</sub><sup>+</sup></b>                        | -          | -          | 0.302 | 0.325 | 165. | 4  | -66.0 | -          | -2620.12967 |
|                                                                                         | 2623.87320 | 2624.33810 | 65    | 71    | 0    | 4  |       | 2619.66463 |             |
| <b>2b(Im)<sub>2</sub> - DCu(II) (Im)<sub>2</sub><sup>+</sup></b>                        | -          | -          | 0.303 | 0.325 | 161. | 4  | -64.2 | -          | -2620.12980 |
|                                                                                         | 2623.86536 | 2624.33053 | 01    | 80    | 6    | 4  |       | 2619.66477 |             |
| <b>3 - Asp1Ala2</b>                                                                     | -779.08983 | -776.78361 | 0.246 | 0.264 | 137. | 8  | -49.1 | -          | -777.03836  |
|                                                                                         |            |            | 82    | 61    | 7    | 8  |       | 776.78361  |             |
| <b>4(H<sub>2</sub>O) - D1A2_Cu2_W</b>                                                   | -          | -          | 0.264 | 0.285 | 150. | 2  | -66.9 | -          | -2491.77117 |
|                                                                                         | 2495.12810 | 2491.32841 | 72    | 83    | 7    | 2  |       | 2491.32841 |             |
| <b>4(H<sub>2</sub>O)(CO<sub>2</sub><sup>-</sup>) - D1A2_Cu2_W_ Om</b>                   | -          | -          | 0.250 | 0.271 | 150. | 2  | -30.6 | -          | -2491.36608 |
|                                                                                         | 2494.72331 | 2490.92930 | 74    | 77    | 8    | 2  |       | 2490.92930 |             |

|                                                                                                  |                 |                 |             |             |           |    |            |                     |             |
|--------------------------------------------------------------------------------------------------|-----------------|-----------------|-------------|-------------|-----------|----|------------|---------------------|-------------|
| <b>4(Im) -</b><br>D1A2_Cu2_Im                                                                    | -<br>2644.96233 | -<br>2640.68527 | 0.313<br>50 | 0.336<br>91 | 165.<br>6 | 8  | -60.0      | -<br>2640.6852<br>7 | -2641.16171 |
| <b>4(Im)(CO<sub>2</sub><sup>-</sup>) -</b><br>D1A2_Cu2_Im_<br>Om                                 | -<br>2644.53791 | -<br>2640.27250 | 0.298<br>49 | 0.322<br>29 | 167.<br>5 | 4  | -32.2      | -<br>2640.2725<br>0 | -2640.74279 |
| <b>4(Im)<sub>2</sub> -</b><br>D1A2_Cu2_Im2                                                       | -<br>2871.21014 | -<br>2866.26446 | 0.385<br>60 | 0.414<br>82 | 197.<br>1 | 4  | -54.8      | -<br>2866.2644<br>6 | -2866.80980 |
| <b>4(Im)<sub>2</sub>(CO<sub>2</sub><sup>-</sup>) -</b><br>D1A2_Cu2_Im2<br>_Om                    | -<br>2870.76150 | -<br>2865.81938 | 0.371<br>44 | 0.400<br>41 | 198.<br>8 | 4  | -42.1      | -<br>2865.8193<br>8 | -2866.35829 |
| <b>5 - L</b>                                                                                     | -777.24067      | -777.47732      | 0.265<br>84 | 0.282<br>20 | 131.<br>9 | 63 | -18.0      | -<br>774.86290      | -775.09954  |
| <b>6(H<sub>2</sub>O)<sub>2</sub> - L</b><br>Cu(II) (H <sub>2</sub> O) <sub>2</sub> <sup>2+</sup> | -<br>2569.99388 | -<br>2570.45670 | 0.319<br>79 | 0.342<br>82 | 155.<br>6 | 8  | -<br>164.5 | -<br>2565.9222<br>3 | -2566.38506 |
| <b>6(Im)(H<sub>2</sub>O) -</b><br>Cu(II)(Im)(H <sub>2</sub> O) <sup>+</sup>                      | -<br>2719.83236 | -<br>2720.32831 | 0.368<br>34 | 0.393<br>72 | 169.<br>4 | 4  | -<br>146.8 | -<br>2715.2916<br>9 | -2715.78764 |
| <b>7 -</b><br>LCu(II)(Im)(NMA<br>)                                                               | -<br>2891.95984 | -<br>2892.50096 | 0.447<br>90 | 0.478<br>39 | 201.<br>3 | 8  | -<br>131.8 | -<br>2886.8532<br>7 | -2887.39439 |
| <b>8a - LDCu(II)<sup>+</sup></b>                                                                 | -<br>2948.63962 | -<br>2949.20121 | 0.424<br>46 | 0.453<br>93 | 192.<br>7 | 6  | -63.1      | -<br>2943.4412<br>5 | -2944.00284 |
| <b>8b - LDCu(II)<sup>+</sup></b>                                                                 | -<br>2948.63756 | -<br>2949.19998 | 0.424<br>16 | 0.454<br>04 | 201.<br>0 | 16 | -69.8      | -<br>2943.4179<br>3 | -2943.98035 |
| <b>9 - LDCu(II)</b><br><b>(Im)<sup>+</sup></b>                                                   | -<br>3174.89160 | -<br>3175.52199 | 0.498<br>31 | 0.532<br>71 | 214.<br>7 | 6  | -51.3      | -<br>3169.0312<br>7 | -3169.66142 |
| <b>2<sup>1</sup>(H<sub>2</sub>O) -</b><br>DCu(I) (H <sub>2</sub> O)                              | -<br>2248.00621 | -<br>2248.36998 | 0.179<br>88 | 0.195<br>69 | 126.<br>3 | 8  | -32.9      | -<br>2244.9725<br>3 | -2245.33630 |

|                                                                                |                 |                 |             |             |           |         |       |                     |             |
|--------------------------------------------------------------------------------|-----------------|-----------------|-------------|-------------|-----------|---------|-------|---------------------|-------------|
| <b>2<sup>l</sup>(Im) - DCu(I)</b><br><b>(Im)</b>                               | -<br>2397.83280 | -<br>2398.22866 | 0.228<br>48 | 0.246<br>41 | 137.<br>5 | 2       | -27.4 | -<br>2394.3299<br>5 | -2394.72582 |
| <b>2<sup>l</sup>(Im)<sub>2</sub> - DCu</b><br><b>(I) (Im)<sub>2</sub></b>      | -<br>2624.07740 | -<br>2624.54246 | 0.300<br>31 | 0.324<br>02 | 168.<br>1 | 4       | -22.9 | -<br>2619.8956<br>4 | -2620.36070 |
| <b>6<sup>l</sup> - LCu(I)</b>                                                  | -<br>2417.46767 | -<br>2417.85754 | 0.269<br>40 | 0.286<br>88 | 132.<br>5 | 2       | -50.9 | -<br>2413.8350<br>1 | -2414.22487 |
| <b>6<sup>l</sup>(Im) -</b><br><b>LCu(I) (Im)</b>                               | -<br>2643.71497 | -<br>2644.17485 | 0.341<br>02 | 0.364<br>48 | 167.<br>7 | 4       | -47.5 | -<br>2639.4008<br>4 | -2639.86072 |
| <b>6<sup>l</sup>(Im)(H<sub>14</sub>H<sub>13</sub>) -</b><br><b>LCu(I) (Im)</b> | -<br>2643.70101 | -<br>2644.16174 | 0.340<br>82 | 0.364<br>71 | 180.<br>3 | 28<br>8 | -57.7 | -<br>2639.3727<br>3 | -2639.83346 |
| <b>7<sup>l</sup> - LCu(I)</b><br><b>(NMA)</b>                                  | -<br>2666.02238 | -<br>2666.49446 | 0.372<br>29 | 0.398<br>61 | 183.<br>9 | 8       | -46.2 | -<br>2661.6077<br>7 | -2662.07985 |
| <b>8a<sup>l</sup> - LDCu(I)</b>                                                | -<br>2948.82952 | -<br>2949.39180 | 0.420<br>65 | 0.451<br>81 | 212.<br>3 | 16      | -39.9 | -<br>2943.6428<br>1 | -2944.20508 |
| <b>8b<sup>l</sup> - LDCu (I)</b>                                               | -<br>2948.83683 | -<br>2949.39836 | 0.421<br>07 | 0.450<br>89 | 194.<br>9 | 6       | -33.3 | -<br>2943.6627<br>0 | -2944.22422 |

<sup>a</sup> Hartrees

<sup>b</sup> cal/mol-K

<sup>c</sup> Number of conformations (assumed equally populated)

<sup>d</sup> kcal/mol

<sup>e</sup> See text for definition of 'MP2/LB'

Table S3. Relative energies at 298 K of species discussed in the text: enthalpies based on B3LYP/LB energies

| Process                                                                                                                                                            | Eqn No. | $\Delta H_{(g)}$     | $-T\Delta S_{(g)}$   | $\Delta G_{(g)}$     | $\Delta\Delta G_{\text{solv}}$ | $\Delta G_{(\text{aq})}$ |
|--------------------------------------------------------------------------------------------------------------------------------------------------------------------|---------|----------------------|----------------------|----------------------|--------------------------------|--------------------------|
|                                                                                                                                                                    |         | kJ mol <sup>-1</sup> | kJ mol <sup>-1</sup> | kJ mol <sup>-1</sup> | kJ.mol <sup>-1</sup>           | kJ mol <sup>-1</sup>     |
| <b>1</b> + Cu(H <sub>2</sub> O) <sub>5</sub> <sup>2+</sup> → <b>2a</b> (H <sub>2</sub> O) <sub>2</sub> + 3H <sub>2</sub> O + H <sup>+</sup>                        | (4a)    | 452.5                | -68.6                | 383.9                | -390.2                         | -46.3                    |
| <b>1</b> + Cu(H <sub>2</sub> O) <sub>5</sub> <sup>2+</sup> → <b>2b</b> (H <sub>2</sub> O) <sub>2</sub> + 3H <sub>2</sub> O + H <sup>+</sup>                        | (4b)    | 482.3                | -76.1                | 406.3                | -403.2                         | -37.0                    |
| <b>1</b> + Cu(H <sub>2</sub> O) <sub>5</sub> <sup>2+</sup> → <b>2c</b> (H <sub>2</sub> O) <sub>2</sub> + 3H <sub>2</sub> O + H <sup>+</sup>                        | (4c)    | 490.6                | -68.8                | 421.8                | -381.4                         | 0.5                      |
| <b>3</b> + Cu(H <sub>2</sub> O) <sub>5</sub> → <b>4</b> (H <sub>2</sub> O) + 4 H <sub>2</sub> O + H <sup>+</sup>                                                   | (5)     | 433.6                | -90.6                | 343.0                | -323.4                         | -20.4                    |
| <b>Im</b> + Cu(H <sub>2</sub> O) <sub>5</sub> <sup>2+</sup> → Cu( <b>Im</b> )(H <sub>2</sub> O) <sub>4</sub> <sup>2+</sup> + H <sub>2</sub> O                      | (6a)    | -159.4               | 6.5                  | -152.9               | 150.3                          | -2.6                     |
| 2 <b>Im</b> + Cu(H <sub>2</sub> O) <sub>5</sub> <sup>2+</sup> → Cu( <b>Im</b> ) <sub>2</sub> (H <sub>2</sub> O) <sub>3</sub> <sup>2+</sup> + 2 H <sub>2</sub> O    | (6b)    | -290.5               | -0.3                 | -290.8               | 273.2                          | -17.6                    |
| <b>2a</b> (H <sub>2</sub> O) <sub>2</sub> + <b>Im</b> → <b>2a</b> (H <sub>2</sub> O) + H <sub>2</sub> O                                                            | (7a)    | -85.1                | 3.9                  | -81.2                | 77.0                           | -4.2                     |
| <b>1</b> + Cu( <b>Im</b> )(H <sub>2</sub> O) <sub>4</sub> <sup>2+</sup> → <b>2a</b> ( <b>Im</b> )(H <sub>2</sub> O) + 3 H <sub>2</sub> O + H <sup>+</sup>          | (7b)    | 526.8                | -71.2                | 455.6                | -463.5                         | -47.9                    |
| <b>2a</b> ( <b>Im</b> )(H <sub>2</sub> O) + <b>Im</b> → <b>2a</b> ( <b>Im</b> ) <sub>2</sub> + H <sub>2</sub> O                                                    | (8a)    | -62.3                | 6.1                  | -56.2                | 68.4                           | 12.2                     |
| <b>1</b> + Cu( <b>Im</b> ) <sub>2</sub> (H <sub>2</sub> O) <sub>3</sub> <sup>2+</sup> → <b>2a</b> ( <b>Im</b> ) <sub>2</sub> + 3 H <sub>2</sub> O + H <sup>+</sup> | (8b)    | 595.6                | -58.4                | 537.2                | -517.9                         | -20.7                    |
| <b>4</b> (H <sub>2</sub> O) + <b>Im</b> → <b>4</b> ( <b>Im</b> ) + H <sub>2</sub> O                                                                                | (9a)    | -86.7                | 3.1                  | -83.6                | 66.2                           | -17.4                    |
| <b>3</b> + Cu(H <sub>2</sub> O) <sub>5</sub> <sup>2+</sup> + <b>Im</b> → <b>4</b> ( <b>Im</b> ) + 5H <sub>2</sub> O + H <sup>+</sup>                               | (9b)    | 347.0                | -87.5                | 259.5                | -257.3                         | -37.8                    |
| <b>4</b> ( <b>Im</b> ) + <b>Im</b> → <b>4</b> ( <b>Im</b> ) <sub>2</sub>                                                                                           | (10)    | -45.9                | 35.9                 | -10.0                | 76.6                           | 66.6                     |
| <b>4</b> ( <b>Im</b> ) + <b>Im</b> + <b>1</b> → <b>2a</b> ( <b>Im</b> ) <sub>2</sub> + <b>3</b>                                                                    | (11)    | -41.9                | 28.8                 | -13.0                | 12.5                           | -0.5                     |



|                                                                                                                                      |       |        |       |        |        |       |
|--------------------------------------------------------------------------------------------------------------------------------------|-------|--------|-------|--------|--------|-------|
| $5 + \text{Cu}(\text{H}_2\text{O})_5^{2+} \rightarrow 6(\text{H}_2\text{O})_2 + 3\text{H}_2\text{O}$                                 | (12)  | -298.4 | -29.5 | -327.9 | 293.8  | -34.0 |
| $6(\text{H}_2\text{O})_2 + \text{Im} \rightarrow 6(\text{Im})(\text{H}_2\text{O}) + \text{H}_2\text{O}$                              | (13)  | -96.8  | 9.6   | -87.2  | 99.7   | 12.5  |
| $6(\text{Im})(\text{H}_2\text{O}) + \text{NMA} \rightarrow 7 + \text{H}_2\text{O}$                                                   | (14)  | 39.4   | -3.7  | 35.7   | -85.4  | -49.7 |
| $1 + 6(\text{H}_2\text{O})_2 \rightarrow 8\text{a} + 2\text{H}_2\text{O} + \text{H}^+$                                               | (15a) | 649.5  | -44.8 | 604.7  | -535.6 | 29.0  |
| $2\text{a}(\text{H}_2\text{O})_2 + 5 \rightarrow 8\text{a} + 2\text{H}_2\text{O}$                                                    | (15b) | -101.4 | -5.7  | -107.1 | 148.4  | 41.3  |
| $1 + 6(\text{Im})(\text{H}_2\text{O}) \rightarrow 9 + \text{H}_2\text{O} + \text{H}^+$                                               | (16a) | 685.8  | -8.4  | 683.6  | -543.8 | 99.7  |
| $9 \rightarrow 8\text{a} + \text{Im}$                                                                                                | (16b) | 54.3   | -46.0 | 8.3    | -91.5  | -83.2 |
| $9 + \text{H}_2\text{O} + \text{H}^+ \rightarrow 5 + 3\text{a}(\text{H}_2\text{O})$                                                  | (16c) | -70.6  | 36.4  | -34.2  | 162.9  | 88.75 |
| $1 + \text{Cu}(\text{H}_2\text{O})_3^+ \rightarrow 2^1(\text{H}_2\text{O}) + 2\text{H}_2\text{O} + \text{H}^+$                       | (17)  | 892.1  | -40.1 | 852.0  | -783.9 | 28.1  |
| $\text{Im} + \text{Cu}(\text{H}_2\text{O})_3^+ \rightarrow \text{Cu}(\text{Im})(\text{H}_2\text{O})^+ + 2\text{H}_2\text{O}$         | (18)  | -67.7  | -16.6 | -84.3  | 73.5   | -10.8 |
| $\text{Im} + \text{Cu}(\text{Im})(\text{H}_2\text{O})^+ \rightarrow \text{Cu}(\text{Im})_2^+ + \text{H}_2\text{O}$                   | (19a) | -105.0 | 8.5   | -96.5  | 84.2   | -12.3 |
| $5 + \text{Cu}(\text{Im})(\text{H}_2\text{O})^+ \rightarrow \text{Cu}(\text{Im})(\text{H}_{13}\text{H}_{14})^+ + \text{H}_2\text{O}$ | (19b) | -89.3  | -5.2  | -94.5  | 67.0   | -27.5 |
| $5 + \text{Cu}(\text{Im})(\text{H}_2\text{O})^+ \rightarrow \text{Cu}(\text{Im})(\text{H}_{14}\text{H}_{13})^+ + \text{H}_2\text{O}$ | (19c) | -115.9 | 2.7   | -113.2 | 102.2  | -11.0 |
| $1 + \text{Cu}(\text{Im})(\text{H}_2\text{O})^+ \rightarrow 2^1(\text{Im}) + \text{H}_2\text{O} + \text{H}^+$                        | (20)  | 896.4  | -8.9  | 887.5  | -808.5 | 39.1  |
| $2^1(\text{Im}) + \text{Im} \rightarrow 2^1(\text{Im})_2$                                                                            | (21)  | -39.0  | 33.6  | -5.4   | 60.8   | 55.4  |
| $1 + \text{Cu}(\text{Im})_2^+ \rightarrow 2^1(\text{Im})_2 + \text{H}^+$                                                             | (22)  | 962.5  | 16.2  | 978.7  | -831.9 | 106.8 |
| $5 + \text{Cu}(\text{H}_2\text{O})_3^+ \rightarrow 6^1 + 3 \text{H}_2\text{O}$                                                       | (23)  | -143.8 | -23.4 | -167.2 | 126.9  | -40.3 |

|                                                                   |       |         |       |         |        |                     |
|-------------------------------------------------------------------|-------|---------|-------|---------|--------|---------------------|
| $1 + 6^I \rightarrow 8a^I + H^+$                                  | (24a) | 1014.7  | -3.7  | 1011.0  | -881.3 | 89.77               |
| $1 + 6^I \rightarrow 8b^I + H^+$                                  | (24b) | 995.1   | 21.4  | 1016.5  | -853.9 | 122.63              |
| $NMA + 6^I \rightarrow 7^I$                                       | (25)  | -38.6   | 26.0  | -12.6   | 58.2   | 45.6                |
| $Im + 6^I \rightarrow 6^I(Im)$                                    | (26)  | -48.2   | 27.9  | -20.3   | 56.4   | 36.1                |
| $2a(H_2O)_2 + e^- \rightarrow 2a^I(H_2O) + H_2O$                  | (27)  | -585.9  | -42.0 | -628.0  | 215.9  | -412.1 <sup>b</sup> |
| $2a(Im)(H_2O) + e^- \rightarrow 2^I(Im) + H_2O$                   | (28)  | -564.2  | -31.4 | -595.6  | 187.8  | -407.8 <sup>b</sup> |
| $2a(Im)_2 + 5 + e^- + H^+ \rightarrow 1 + Cu(Im)(H_{13}H_{14})^+$ | (29a) | -1487.6 | -33.8 | -1521.4 | 994.8  | -526.6 <sup>b</sup> |
| $2a(Im)_2 + 5 + e^- + H^+ \rightarrow 1 + Cu(Im)(H_{14}H_{13})^+$ | (29b) | -1514.2 | -25.9 | -1540.1 | 1030.0 | -510.1 <sup>b</sup> |
| $2a(Im)_2 + 5 + e^- + H^+ \rightarrow 1 + 6^I(Im) + Im$           | (30)  | -1522.6 | -7.4  | -1530.1 | 1037.7 | -492.4 <sup>b</sup> |
| $2a(Im)_2 + 5 + e^- + H^+ \rightarrow 1 + 6^I + 2 Im$             | (31)  | -1474.5 | -35.3 | -1509.8 | 981.3  | -528.5 <sup>b</sup> |
| $6(H_2O)_2 + e^- \rightarrow 6^I + 2 H_2O$                        | (32)  | -871.0  | -64.5 | -1540.2 | 978.3  | -561.8 <sup>b</sup> |
| $6(Im)(H_2O) + e^- \rightarrow 6^I + Im + H_2O$                   | (33)  | -774.2  | -74.1 | -848.3  | 343.0  | -505.3 <sup>b</sup> |
| $7 + e^- \rightarrow 6^I + Im + NMA$                              | (34)  | -734.8  | -77.8 | -812.6  | 257.6  | -555.0 <sup>b</sup> |
| $6(Im)(H_2O) + e^- \rightarrow 6^I(Im) + H_2O$                    | (35)  | -822.3  | -46.2 | -868.6  | 399.4  | -469.2 <sup>b</sup> |

<sup>a</sup> Numbered structures are presented in Figures 1 – 4. <sup>b</sup> The enthalpy correction, 50 kJ mol<sup>-1</sup> has not been added
